# Supplementary material for: Copper doping boosts the catalase-like activity of atomically precise gold nanoclusters for cascade reactions combined with urate oxidase in the ZIF-8 matrix
Source: Royal Society of Chemistry journal article supplement (doi:10.1039/d4qi00573b), 2024-01-01
Supplement: d4qi00573b1.pdf [file d4qi00573b1.pdf]

## Supporting Information

### **Copper doping boosts catalase-like activity of atomically precise gold nanoclusters for cascade reactions combined with urate oxidase in ZIF-8 matrix**

Yi-Shu Wang,<sup>‡</sup> Yan Chen,<sup>‡</sup> Chen Dong, Zhao-Yang Wang, Jinqiang Cai, Xueli Zhao, Hui-Lin Mo\* and Shuang-Quan Zang\*

*Tianjian Laboratory of Advanced Biomedical Sciences, Institute of Advanced Biomedical Sciences, Henan Key Laboratory of Crystalline Molecular Functional Materials, Henan International Joint Laboratory of Tumor Theranostic Cluster Materials, Green Catalysis Center and College of Chemistry, Zhengzhou University, Zhengzhou 450001, China*

\*Corresponding authors (E-mail: zangsqzg@zzu.edu.cn, mohl@zzu.edu.cn)

[<sup>‡</sup>] These authors contributed equally to this work

## **Table of Contents**

- 1. Experimental Section** (on page S3-S7)
- 2. Supporting Figures and Tables** (on page S8-S44)
- 3. References** (on page S45-S46)

# 1. Experimental Section

## Reagents and Chemicals.

All reagents and solvents used were of commercially available reagent grade and used without further purification. Gold chloride ( $\text{HAuCl}_4 \cdot 3\text{H}_2\text{O}$ ) was purchased from Alfa Aesar. MPA was obtained from TCI. Copper nitrate ( $\text{Cu}(\text{NO}_3)_2$ ), zinc nitrate ( $\text{Zn}(\text{NO}_3)_2$ ), and 2-Methylimidazole were purchased from Aladdin. Sodium hydroxide ( $\text{NaOH}$ ) was purchased from Yong Da Chemical. The Catalase Assay Kit and BCA protein assay kit were purchased from Beyotime Biotechnology. HRP and fluorescein isothiocyanate (FITC) were obtained from Sangon Biotech. Uricase, trypsin and 3,3',5,5'-Tetramethylbenzidine (TMB) were purchased from Solarbio. Uric acid was obtained from Energy Chemical.

## Characterization.

Ultraviolet-visible (UV-vis) spectroscopy was recorded on a PerkinElmer EnSight HH3400 spectrophotometer. Bruker microTOF-Q system was employed to obtain Electrospray ionization mass spectra (ESI-MS). Inductively coupled plasma mass spectrometry (ICP-MS) was performed on a X Series ICP-MS (Thermo Fisher Scientific). X-ray photoelectron spectroscopy (XPS) measurements were taken by a ESCALAB 250Xi spectrometer. Fourier transform infrared (FTIR) spectra were measured on Nicolet NEXUS 470-FTIR. Raman spectra were collected at room temperature using a 532 nm single-frequency diode laser (Spectra-Physics) with and a CCD detector (LabRAM HR Evolution).  $\zeta$  potential were measured by Horiba Scientific Nanopartica Nano Particle Analyzer SZ-100V2. Transmission electron microscopy (TEM) images and EDS mapping of elemental distributions were measured on a FEI TECNAIG2F20-S-TWIN high-resolution transmission electron microscope operating. Powder X-ray diffraction (PXRD) patterns were recorded using X'Pert PRO diffractometer with a  $\text{Cu K}\alpha$  anode ( $\lambda = 1.54178 \text{ \AA}$ ) at 40 kV and 20 mA. Confocal laser scanning microscopy (CLSM) images were collected by using Leica TCS SP8 X confocal microscope.

## Synthesis of $\text{Au}_{25}(\text{MPA})_{18}$ and $\text{Au}_{24}\text{M}_1(\text{MPA})_{18}$

Synthesis of  $\text{Au}_{25}(\text{MPA})_{18}$  was referred to the previously reported literature with moderate modifications.<sup>1,2</sup> Briefly,  $\text{HAuCl}_4$  aqueous solutions (40 mM, 0.25 mL) and MPA (100 mM, 0.2 mL) were added to water (4.55 mL) and stirred at room temperature for 5 min. Then the pH of the mixed solution was adjusted to 12.0 by dropwise adding aqueous solution of 5 mM  $\text{NaOH}$ . After 30 min, The CO was introduced into the solution for 5 min. The reaction vessel was then kept airtight and the reaction was allowed to proceed for 24 h under gentle stirring (500 rpm) at room temperature. For further purification of nanoclusters, A 3 kDa ultrafiltration tube at 3500 rpm/min was used to remove smaller organic ligands. The obtained samples are stored in dark at 4 °C for further analysis. Synthesis of  $\text{Au}_{24}\text{M}_1\text{MPA}_{18}$  (M=Cu or Zn) was following the same method by replacing the Au atoms in  $\text{HAuCl}_4$  (40 mM, 0.25 mL) with various nitrate metal ions ( $\text{Cu}^{2+}$ ,  $\text{Zn}^{2+}$ ) at a 4% molar ratio (Au : M = 24:1).<sup>3,4</sup>

## Preparation of $\text{UO}_x@\text{ZIF-8}$ and $\text{UO}_x\text{-Au}_{24}\text{Cu}_1@\text{ZIF-8}$

In detail, 1 mL of 2-methylimidazole (0.7 M) containing 600  $\mu\text{g}$  of  $\text{Au}_{24}\text{Cu}_1$  and 300  $\mu\text{g}$  of  $\text{UOx}$  was stirred gently at room temperature. Afterward, 1 mL of zinc nitrate hexahydrate (10 mM) was added quickly, and the mixture was stirred overnight at room temperature. Then the final product was centrifuged (8000 rpm, 5 min) and washed with ultrapure water three times. Synthesis of  $\text{UOx}@ZIF-8$  composite was following the same protocol by replacing the multi-enzyme solution with  $\text{UOx}$  ( $\text{UOx}$  in  $\text{UOx}@ZIF-8$  amount is equal to that of  $\text{UOx}$  in  $\text{UOx-Au}_{24}\text{Cu}_1@ZIF-8$ ).

### **Synthesis of FITC- $\text{UOx}@ZIF-8$ and FITC- $\text{UOx-Au}_{24}\text{Cu}_1@ZIF-8$**

FITC saturated aqueous solution (200  $\mu\text{L}$ ) was added to  $\text{UOx}$  solution (200  $\mu\text{L}$ , 5 mg/mL), followed by shaking at room temperature in the dark. Dialysis bag (3500 D) was used to remove free FITC. FITC- $\text{UOx}$  was collected after 48 h. Synthesis of FITC- $\text{UOx}@ZIF-8$  or FITC- $\text{UOx-Au}_{24}\text{Cu}_1@ZIF-8$  was following the same method of  $\text{UOx}@ZIF-8$  and  $\text{UOx-Au}_{24}\text{Cu}_1@ZIF-8$ .

### **Loading amount**

The enzyme concentration was analyzed according to the standard protocol of the BCA protein assay kit. The  $\text{UOx}$  loading efficacy (%) was calculated using Eq. 1:

$$\text{UOx loading efficacy (\%)} = \frac{m_0 - m_1}{m} \times 100$$

where  $m_0$  (mg),  $m_1$  (mg) and  $m$  (mg) represent the weight of  $\text{UOx}$  before encapsulation,  $\text{UOx}$  of the supernatants after immobilization and  $ZIF-8$ , respectively.

The loading content of  $\text{UOx}$  in  $ZIF-8$  determined by BCA assay using UV-vis spectroscopy was about 30%, resulting from the decreased characteristic peak absorption value in the supernatant before and after encapsulation process.

### **X-ray absorption spectroscopy measurements and data processing.**

$\text{Au-L}_3$  edge and  $\text{Cu K-edge}$  were obtained with Si (111) crystal monochromators at the BL11B beamlines at the Shanghai Synchrotron Radiation Facility (SSRF) (Shanghai, China). Before the analysis at the beamline, samples were pressed into thin sheets with 1 cm in diameter and sealed using Kapton tape film. The XAFS spectra were recorded at room temperature using a 4-channel Silicon Drift Detector (SDD) Bruker 5040.  $\text{Au-L}_3$  edge extended X-ray absorption fine structure (EXAFS) spectra of  $\text{Au}_{25}$  was recorded in transmission mode.  $\text{Au-L}_3$  edge and  $\text{Cu K-edge}$  extended X-ray absorption fine structure (EXAFS) spectra of  $\text{Au}_{24}\text{Cu}_1$  and  $\text{UOx-Au}_{24}\text{Cu}_1@ZIF-8$  were obtained in fluorescence mode. Negligible changes in the line-shape and peak position of  $\text{Au-L}_3$  edge and  $\text{Cu K-edge}$  XANES spectra were observed between two scans taken for a specific sample.

Data reduction, data analysis, and EXAFS fitting were performed and analyzed with the Athena and Artemis programs of the Demeter data analysis packages that utilizes the FEFF6 program to fit the EXAFS data. The energy calibration of the sample was conducted through standard and  $\text{Au}$  foil and  $\text{Cu}$  foil, which as a reference was simultaneously measured. A linear function was subtracted from the pre-edge region, then the edge jump was normalized using Athena software. The  $\chi(k)$  data were isolated by subtracting a smooth, third-order polynomial

approximating the absorption background of an isolated atom. The  $k^3$ -weighted  $\chi(k)$  data were Fourier transformed after applying a HanFeng window function ( $\Delta k = 1.0$ ). For EXAFS modeling, The global amplitude EXAFS (CN, R,  $\sigma^2$  and  $\Delta E_0$ ) were obtained by nonlinear fitting, with least-squares refinement, of the EXAFS equation to the Fourier-transformed data in R-space, using Artemis software, EXAFS of the Au foil and Cu foil are fitted and the obtained amplitude reduction factor S02 value (0.839 and 0.890) was set in the EXAFS analysis to determine the coordination numbers (CNs) in the Au-S and Cu-S scattering path in sample.

### Computational details

The density functional theory (DFT)<sup>5</sup> calculations were performed by using the Gaussian 16 program. The geometric structures of all involved transition states were optimized by using the M06-2X density functional, combined with the def2-SVP. The harmonic frequency calculations were conducted at the same level to corroborate each transition state has one and only one imaginary frequency and other structures have no imaginary frequency. The 3D structures of the molecules were rendered by using the CYLview.<sup>6</sup>

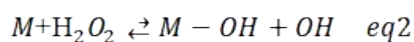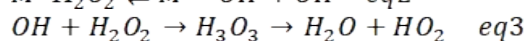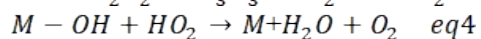

### CAT-like properties test

The activities of catalase (CAT) were measured using Catalase Assay Kit.  $H_2O_2$  (250 mM, 10  $\mu$ L) and Au NCs (10 mg/mL, 12  $\mu$ L) were added to the centrifuge tube and incubation for 5 min at 25 °C. The remaining  $H_2O_2$  can oxidize the chromogenic substrate under the catalysis of peroxide to produce a red product (N-4-antipyryl-3-chloro-5-sulfonate-p-benzoquinoneminoimine), which can be detected in a 96-well plate at 520 nm. CAT activity was measured by measuring the decomposition of  $H_2O_2$  using a UV-Visible spectrophotometer.

The reaction solutions contained 3 mg/mL of Au NCs and 5 mM  $H_2O_2$  in deionized water for different time (0-20 h) to obtain the photos of  $O_2$  production.

Kinetic assessment of the CAT-like activity of AuNCs was measured by monitoring the increase in  $O_2$  concentration with an oxygen probe (JPBJ-608 Portable Dissolved Oxygen Meter). Different concentrations of  $H_2O_2$  (50–300 mM) and 0.5 mg/ml of AuNCs were added to the system to monitor the solubility change of  $O_2$  every 5 s at pH 7.0 at room temperature.

The initial reaction rates were calculated from the slope of  $O_2$  generation and applied to the Michaelis–Menten equation as Eq. 5:

$$v = \frac{v_{\max}[S]}{K_m + [S]}$$

where  $v$  is the mean velocity,  $v_{\max}$  is the maximal reaction velocity,  $[S]$  is the initial concentration of the substrate, and  $K_m$  is the Michaelis–Menten constant.

The values of the kinetic parameters ( $v_{\max}$  and  $K_m$ ) were calculated by the Lineweaver-Burk Plot as Eq. 6:

$$\frac{1}{v} = \frac{K_m}{v_{\max}} \times \frac{1}{[S]} + \frac{1}{v_{\max}}$$

After detection the velocity versus vary concentration of substrate, a plot of  $1/[S]$  against  $1/v$  according to the Eq. 6 gave a straight line. The  $V_{\max}$  and  $K_m$  could be acquired by the slope and intercept of this line.

### Effect of pH, Time, and Temperature on the Activity of Au NCs

Effect of pH: Au NCs (2.4 mg/mL Au<sub>25</sub>, Au<sub>24</sub>Cu<sub>1</sub> or Au<sub>24</sub>Zn<sub>1</sub>) were incubated with H<sub>2</sub>O<sub>2</sub> (250 mM, 10 μL) in different PBS buffer (pH 4.0 to 8.0) at 25 °C for 5 min.

Effect of time: Au NCs (2.4 mg/mL Au<sub>25</sub>, Au<sub>24</sub>Cu<sub>1</sub> or Au<sub>24</sub>Zn<sub>1</sub>) were incubated with H<sub>2</sub>O<sub>2</sub> (250 mM, 10 μL) at 25 °C for different time (5-300 min).

Effect of temperature: Au NCs (2.4 mg/mL Au<sub>25</sub>, Au<sub>24</sub>Cu<sub>1</sub> or Au<sub>24</sub>Zn<sub>1</sub>) were incubated with H<sub>2</sub>O<sub>2</sub> (250 mM, 10 μL) at different temperature (4, 25, 30, 37, 45 °C) for 5 min.

The rest reaction steps were following the abovementioned method by using Catalase Assay Kit.

### Resistance ability Measurement

UOx-Au<sub>24</sub>Cu<sub>1</sub>@ZIF-8 (the final concentration of the UOx is 0.1mg/mL) was added to PBS (50 mM, pH 8.0) at different temperatures (4, 10, 25, 30, 37, 45 °C). After incubation at specific temperature for 30 min, the catalytic degradation of UA was detected at 292 nm by a UV-vis spectrophotometer. Before the activity test, the mixture will be suspended in solution. The effect of temperature on catalytic activity of UOx-Au<sub>24</sub>Cu<sub>1</sub> were consistent with the above method. The final concentration of UOx and Au<sub>24</sub>Cu<sub>1</sub> in UOx-Au<sub>24</sub>Cu<sub>1</sub> is equal to that in UOx-Au<sub>24</sub>Cu<sub>1</sub>@ZIF-8).

The optimum reaction pH of the UOx-Au<sub>24</sub>Cu<sub>1</sub> and UOx-Au<sub>24</sub>Cu<sub>1</sub>@ZIF-8 for UA degradation were evaluated by studying catalytic activity of UOx-Au<sub>24</sub>Cu<sub>1</sub> and UOx-Au<sub>24</sub>Cu<sub>1</sub>@ZIF-8 in PBS (50 mM) with different pH (pH 7.0-12) at 37°C. The other reaction steps were similar to the above temperature resistance experiment.

UOx-Au<sub>24</sub>Cu<sub>1</sub> or UOx-Au<sub>24</sub>Cu<sub>1</sub>@ZIF-8 was dispersed in PBS (50 mM, pH 8.0), then added into trypsin aqueous solutions (0.3 mg/mL). After incubation for 0-50 min at 37 °C, the rest reaction steps were similar to the process above mentioned.

First, by compare the initial value and residual value of the characteristic peak of UA at 292 nm to obtain the degradation amount ( $\Delta 292$  nm). The highest degradation amount was regard as corresponding control and to be 100% in each experimental condition. The relative activity (%) was calculated using Eq. 7:

$$\text{Relative activity (\%)} = \frac{\Delta 292 \text{ nm in each sample}}{\Delta 292 \text{ nm in control}} \times 100$$

### Measurement of UA Degradation

The typical assay contained UOx-Au<sub>24</sub>Cu<sub>1</sub>@ZIF-8 (the final concentration of the UOx is 0.1 mg/mL) and 100 μM UA in PBS buffer (50 mM, pH 8.0) at 37 °C. The catalytic efficiency of UA degradation was monitored by measuring the changes of absorbance at 292 nm every 5 min after shaking using a UV-Visible spectrophotometer.

The catalytic activity of UOx, Au<sub>24</sub>Cu<sub>1</sub>, UOx-Au<sub>24</sub>Cu<sub>1</sub>, Au<sub>24</sub>Cu<sub>1</sub>@ZIF-8, and UOx@ZIF-8 were determined by the same method (UOx and Au<sub>24</sub>Cu<sub>1</sub> amount in these samples are equal to that of UOx-Au<sub>24</sub>Cu<sub>1</sub>@ZIF-8). The degradation of UA was calculated by the following Eq. 8:

$$\Delta 292 \text{ nm} = A_{292}^t - A_{292}^0$$

where  $A_{292}^0$  and  $A_{292}^t$  represent the characteristic absorbance of UA initially and after reaction (at specific time), respectively.

### Detection of accumulated H<sub>2</sub>O<sub>2</sub> after UA Degradation

The reaction mixture contained UOx@ZIF-8 or UOx-Au<sub>24</sub>Cu<sub>1</sub>@ZIF-8 (the final concentration of the UOx is 0.1 mg/mL) and 100  $\mu$ M UA in PBS buffer. After reaction for a specific time (0-10 min) at 37 °C, UOx@ZIF-8 or UOx-Au<sub>24</sub>Cu<sub>1</sub>@ZIF-8 composite was removed using a filter with a size of 13 nm. Then, the pH value of the obtained supernatant was adjusted to 6.0. HRP (1.2  $\mu$ L, 8 mg/mL) as catalyst and TMB (3  $\mu$ L, 10 mM) as chromogenic substrate were added into 150  $\mu$ L of above solution. The reaction sustained for 2 min before terminating by adding 150  $\mu$ L 1 M H<sub>2</sub>SO<sub>4</sub>. The absorbance of these solution was recorded at 450 nm corresponding to H<sub>2</sub>O<sub>2</sub> amount in a 96-well plate on a PerkinElmer EnSight HH3400 UV-VIS Spectrophotometer. The catalytic activity of UOx, Au<sub>24</sub>Cu<sub>1</sub>, UOx-Au<sub>24</sub>Cu<sub>1</sub>, and Au<sub>24</sub>Cu<sub>1</sub>@ZIF-8 were determined by the same method (UOx and Au<sub>24</sub>Cu<sub>1</sub> amount in these samples are equal to that of UOx-Au<sub>24</sub>Cu<sub>1</sub>@ZIF-8).

### Stability Measurement

UOx-Au<sub>24</sub>Cu<sub>1</sub> or UOx-Au<sub>24</sub>Cu<sub>1</sub>@ZIF-8 was dispersed into deionized water and acquired at given time to test the residual enzymatic activity, which was determined by detecting the typical peak of UA at 292 nm in the reaction system after catalyzed by the sample for 50 min. The initial activity of UOx-Au<sub>24</sub>Cu<sub>1</sub>@ZIF-8 was regarded as corresponding control and to be 100% in this experiment. The relative activity (%) was calculated using the following Eq. 7.

### Reusability study

For the recycling study, UOx-Au<sub>24</sub>Cu<sub>1</sub>@ZIF-8 and UOx-Au<sub>24</sub>Cu<sub>1</sub> (the final concentration of the UOx is 0.1 mg/mL), and 100  $\mu$ M UA were contained in PBS buffer (50 mM, pH 8.0). After reaction for 10 min, the absorbance of the mixture was detected at 292 nm by a UV-vis spectrophotometer. Before the reaction process was repeated, the recovered composite was obtained by centrifugation and then the supernatant was removed. The degradation of UA was calculated following Eq. 8. The relative activity was calculated as a ratio of each cycle's catalytic activity and first cycle's catalytic activity.

## 2. Supporting Figures and Tables

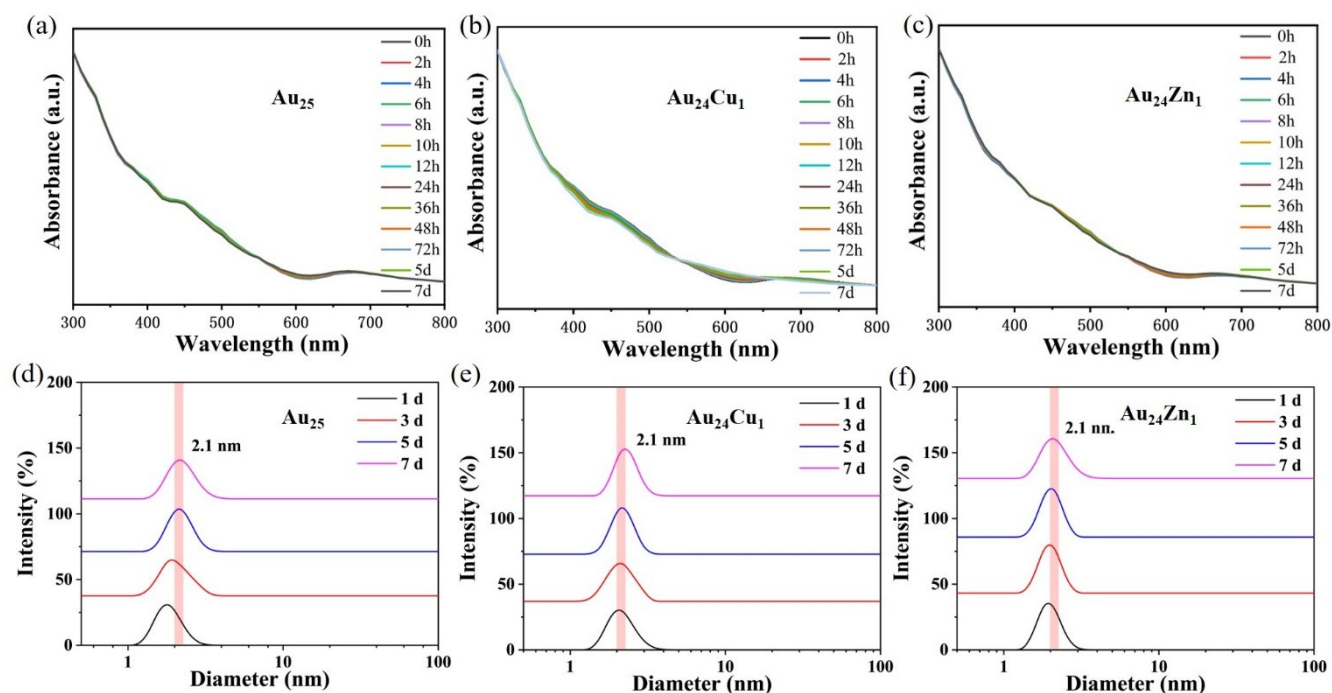

**Fig. S1.** Stability test of Au<sub>24</sub>M<sub>1</sub> with UV-Vis. UV-vis spectra of (a) Au<sub>25</sub>, (b) Au<sub>24</sub>Cu<sub>1</sub> and (c) Au<sub>24</sub>Zn<sub>1</sub> dissolved in H<sub>2</sub>O under 4°C and dark conditions for one week. The UV-vis absorption spectra of Au<sub>25</sub>, Au<sub>24</sub>Cu<sub>1</sub>, and Au<sub>24</sub>Zn<sub>1</sub> didn't change significantly after 7 days in water, indicating the satisfied stability of these clusters. Hydrodynamic diameter of (d) Au<sub>25</sub>, (e) Au<sub>24</sub>Cu<sub>1</sub> and (f) Au<sub>24</sub>Zn<sub>1</sub> was determined at specific time by dynamic light scattering (DLS) in ultrapure water.



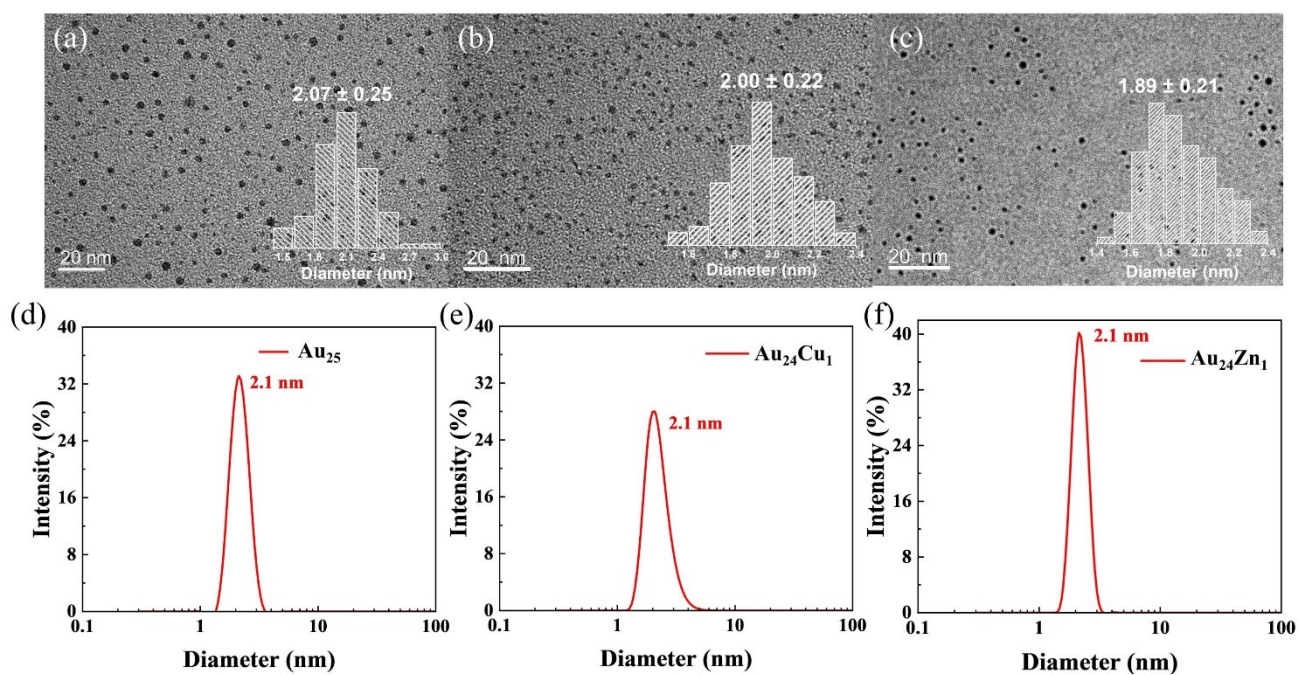

**Fig. S2.** TEM images of (a) Au<sub>25</sub>, (b) Au<sub>24</sub>Cu<sub>1</sub> and (c) Au<sub>24</sub>Zn<sub>1</sub>. The inset in each figure is the size distribution of clusters analyzed by Image J. Hydrodynamic diameter of (d) Au<sub>25</sub>, (e) Au<sub>24</sub>Cu<sub>1</sub> and (f) Au<sub>24</sub>Zn<sub>1</sub> was determined by DLS in ultrapure water.

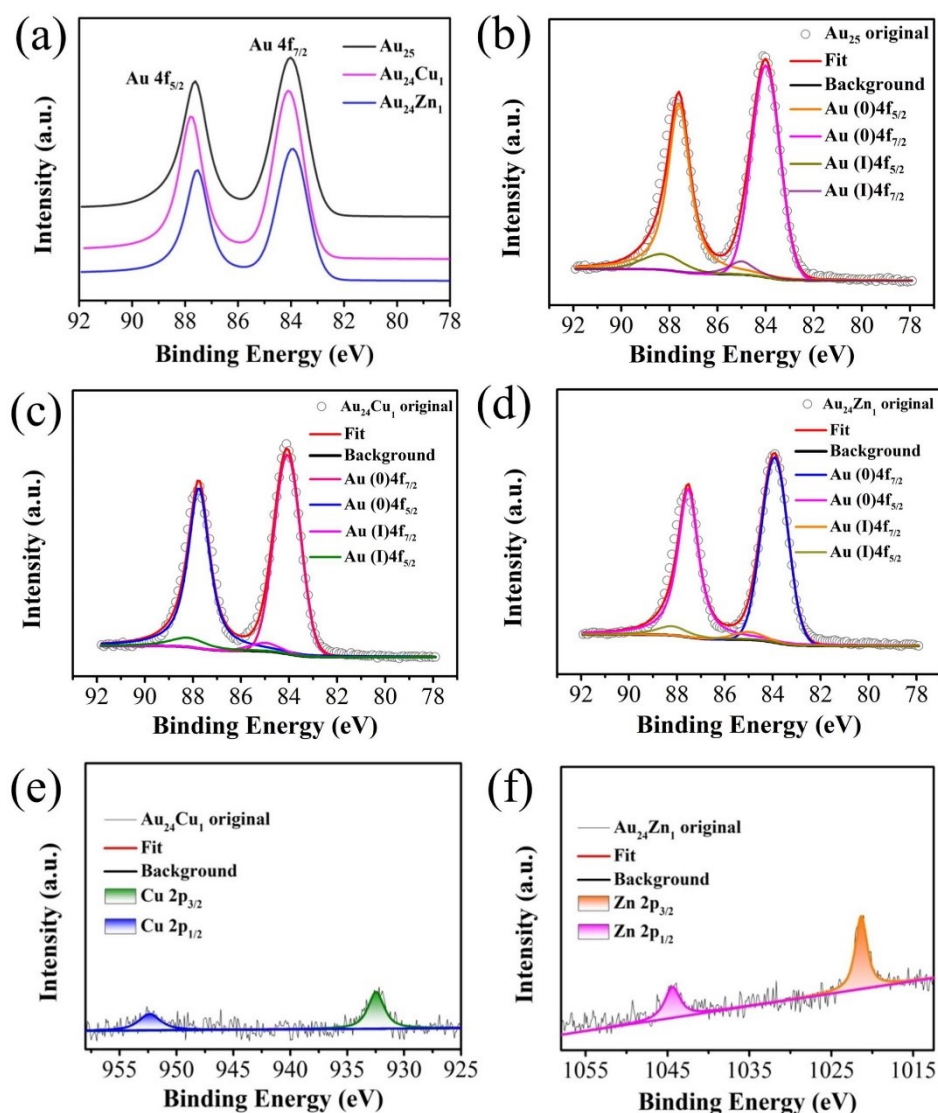

**Fig. S3.** (a) X-ray photoelectron spectroscopy. Au 4f region of each sample. The high-resolution original and fitted Au 4f region of (b) Au<sub>25</sub>, (c) Au<sub>24</sub>Cu<sub>1</sub> and (d) Au<sub>24</sub>Zn<sub>1</sub> clusters. Cu 2p XPS spectrum of (e) Au<sub>24</sub>Cu<sub>1</sub> and Zn 2p spectrum of (f) Au<sub>24</sub>Zn<sub>1</sub>. All binding energies were calibrated with a C 1s peak of 284.8 eV. Cu 2p peaks (Cu 2p<sub>3/2</sub> = 932.5 eV, Cu 2p<sub>1/2</sub> = 952.4 eV) were observed. Zn 2p peaks (Zn 2p<sub>3/2</sub> = 1021.3 eV, Zn 2p<sub>1/2</sub> = 1044.3 eV) were observed. The X-ray photoelectron spectroscopy (XPS) spectrum indicated that mix valence state of Au, including Au (0) and Au (I) existed in all clusters. Besides, the binding energy of 932.5 eV (Cu 2p<sub>3/2</sub>) and 952.4 eV (Cu 2p<sub>1/2</sub>) indicated the presence of Cu (I),<sup>7, 8</sup> which was probably formed by the reduction of Cu<sup>2+</sup> during the preparation.

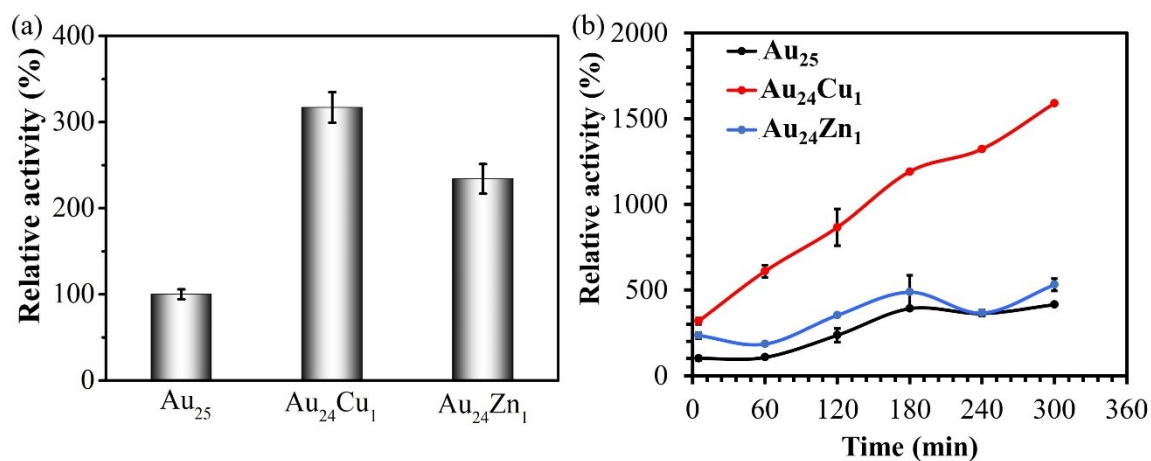

**Fig. S4.** CAT-like activities of Au<sub>25</sub>, Au<sub>24</sub>Cu<sub>1</sub> and Au<sub>24</sub>Zn<sub>1</sub>. (a) Comparison of the CAT-like capacities of Au NCs after reaction for 5 min. (b) The consumption concentration of H<sub>2</sub>O<sub>2</sub> facilitated by Au NCs as a function of reaction time. The catalytic activity of AuNCs was studied by using Catalase Assay Kit. with a characteristic peak at 520 nm.

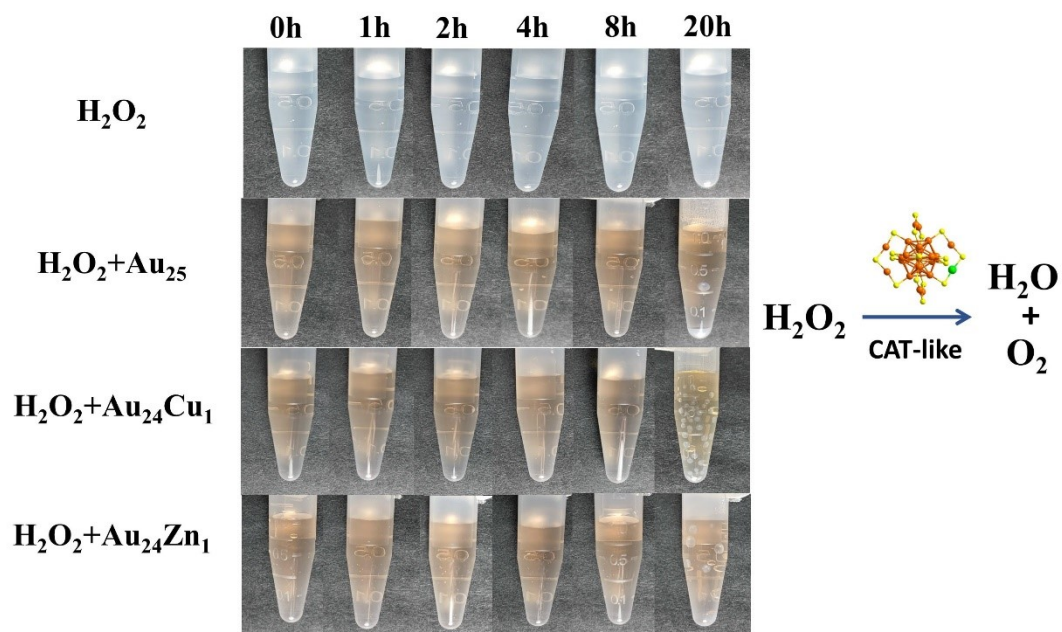

**Fig. S5.** Photographs of  $\text{Au}_{25}$ ,  $\text{Au}_{24}\text{Cu}_1$  and  $\text{Au}_{24}\text{Zn}_1$  reacting with  $\text{H}_2\text{O}_2$  at different times. Abundant bubbles were observed in the system under catalysis by  $\text{Au}_{24}\text{Cu}_1$  compared with other two AuNCs, which was in accordance with former results.

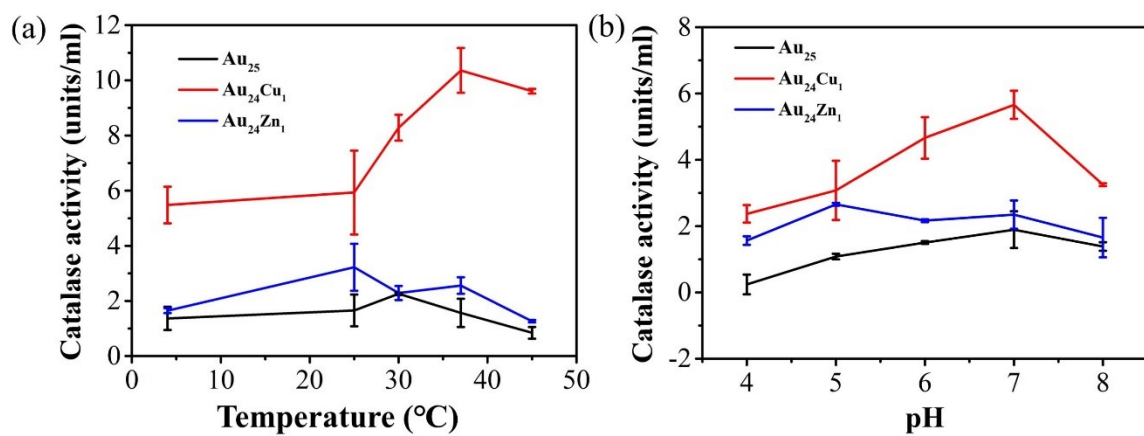

**Fig. S6.** CAT-like activities of Au<sub>25</sub>, Au<sub>24</sub>Cu<sub>1</sub> and Au<sub>24</sub>Zn<sub>1</sub> in different (a) temperature and (b) pH values. The optimum temperature and pH value for CAT-like activity of Au<sub>24</sub>Cu<sub>1</sub> was about 37°C and 7, respectively.

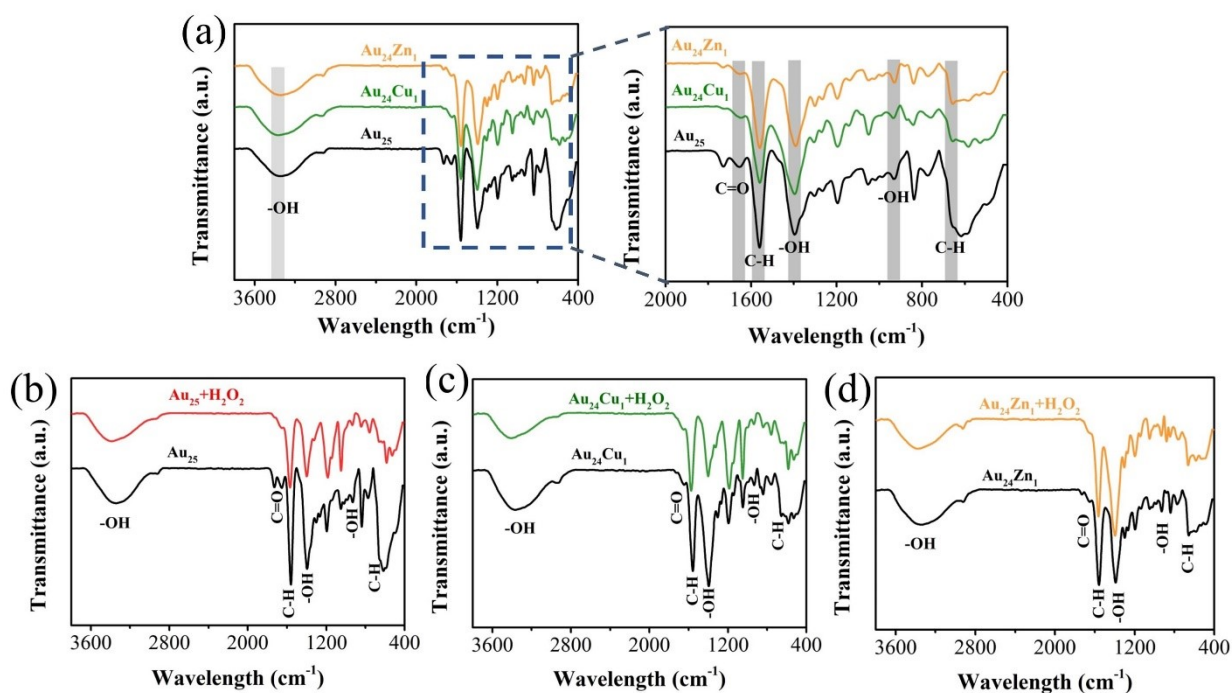

**Fig. S7.** Fourier-transform infrared (FT-IR) spectra of Au<sub>25</sub>, Au<sub>24</sub>Cu<sub>1</sub> and Au<sub>24</sub>Zn<sub>1</sub> clusters (a) before and (b-d) after the reaction with H<sub>2</sub>O<sub>2</sub>. The inset in figure a is a magnification of the FT-IR spectra between 400~2000 cm<sup>-1</sup>. Considering that the catalytic performance can be affected by the structure, we determined FT-IR spectra of AuNCs. The infrared vibration peak does not change significantly before and after the reaction of H<sub>2</sub>O<sub>2</sub>, indicating that the ligand structure basically maintain.

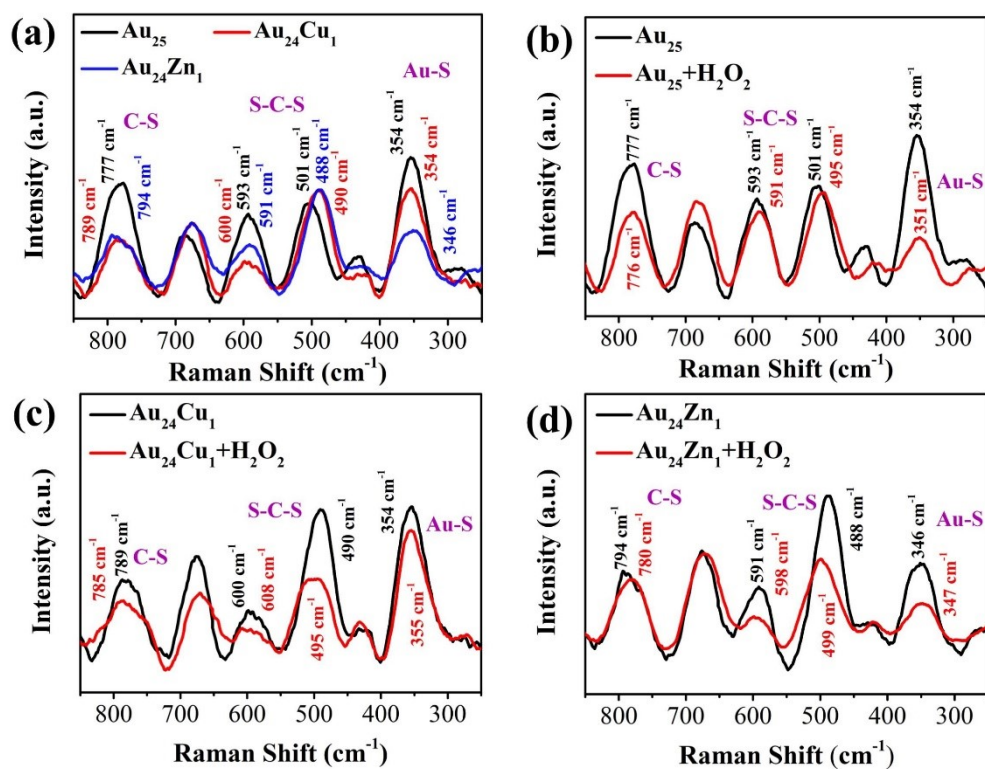

**Fig. S8.** Raman spectra of  $\text{Au}_{25}$ ,  $\text{Au}_{24}\text{Cu}_1$  and  $\text{Au}_{24}\text{Zn}_1$  clusters (a) before and (b-d) after the reaction with  $\text{H}_2\text{O}_2$ . Negligible changes were observed in the Raman peaks of  $\text{Au}_{25}$ ,  $\text{Au}_{24}\text{Cu}_1$  and  $\text{Au}_{24}\text{Zn}_1$  clusters before and after the reaction with  $\text{H}_2\text{O}_2$ , indicating that the structure of these cluster hardly changed.

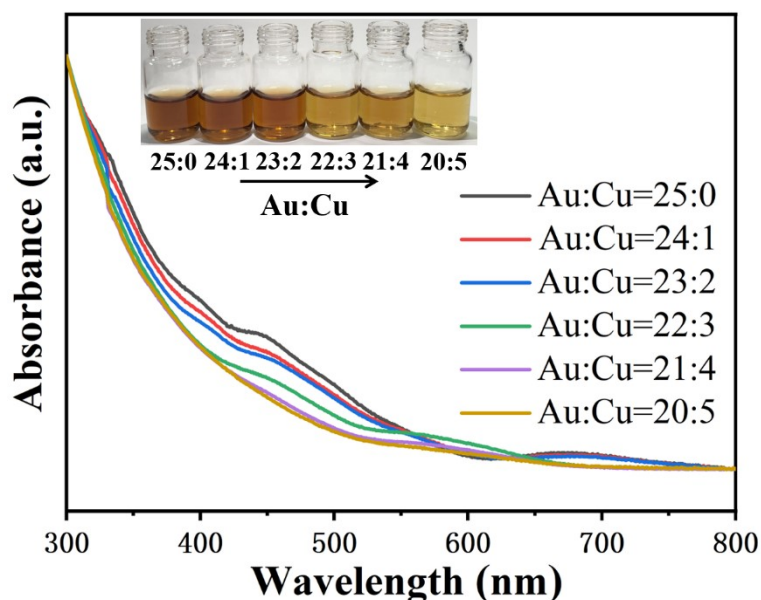

**Fig. S9.** UV-Vis absorption spectra of  $\text{Au}_{25}$  substituted with different molar concentrations of Cu (Au:Cu=25:0, 24:1, 23:2, 22:3, 21:4, 20:5). The inset in Figure S9 is the photos of  $\text{Au}_{25-x}\text{Cu}_x$  ( $x=0-5$ ). Different molar concentrations of Cu were doped into  $\text{Au}_{25}$  to synthesize  $\text{Au}_{25-x}\text{Cu}_x(\text{MPA})_{18}$  (denoted as  $\text{Au}_{25-x}\text{Cu}_x$ ,  $x=0-5$ ), in which the molar concentrations between Au and Cu were 25:0, 24:1, 23:2, 22:3, 21:4, and 20:5, respectively. Synthesis process of  $\text{Au}_{25-x}\text{Cu}_x$  ( $x=1-5$ ) was following the same method as  $\text{Au}_{25}$  by replacing the Au atoms with nitrate metal ion ( $\text{Cu}^{2+}$ ) at a serious molar ratio.  $\text{Au}_{25}$ ,  $\text{Au}_{24}\text{Cu}_1$ , and  $\text{Au}_{23}\text{Cu}_2$  all exhibited the characteristic peaks at approximately 450 nm and 670 nm, confirming their similar structure. However, the characteristic peaks at 450 nm and 670 nm disappeared in other samples, in which the ratio of raw materials containing Au and Cu were 22:3, 21:4, and 20:5, indicating that their structure were different from  $\text{Au}_{25}$ . Thus, we compared the stability and CAT-like activity of  $\text{Au}_{25}$ ,  $\text{Au}_{24}\text{Cu}_1$  and  $\text{Au}_{23}\text{Cu}_2$  subsequently.



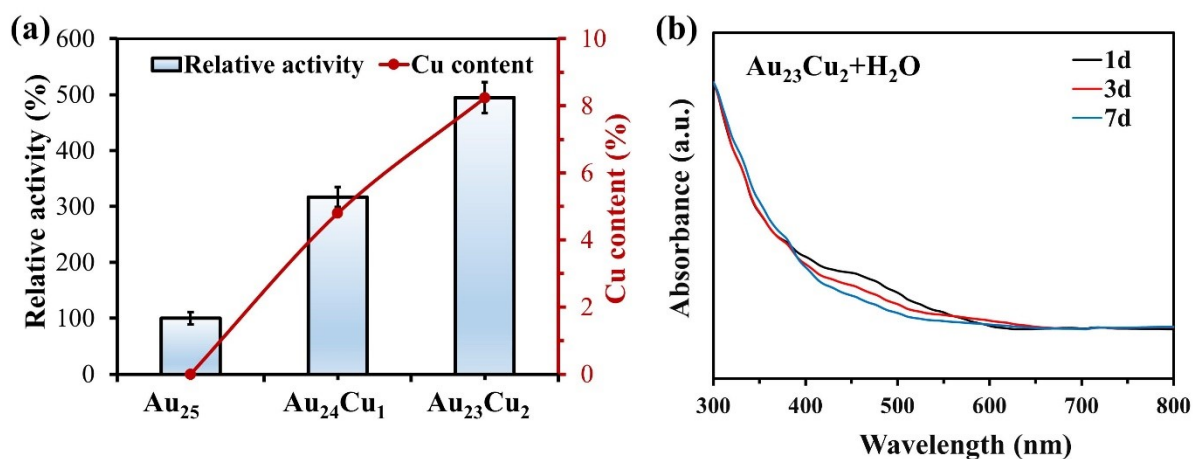

**Fig. S10.** (a) Comparison of the CAT-like capacities and Cu content of Au<sub>25</sub>, Au<sub>24</sub>Cu<sub>1</sub> and Au<sub>23</sub>Cu<sub>2</sub>. Synthetic process of Au<sub>23</sub>Cu<sub>2</sub> was similar to that of Au<sub>24</sub>Cu<sub>1</sub> with changes of the ratio of raw materials. CAT-like capacities was monitored using Catalase Assay Kit after reaction for 5 min. The Cu content in AuNCs was determined by ICP-MS. (b) Stability test of Au<sub>23</sub>Cu<sub>2</sub> with UV-Vis. UV-vis spectra of Au<sub>23</sub>Cu<sub>2</sub> dissolved in H<sub>2</sub>O for 1 day, 3 days and 7 days. The UV-vis absorption spectra of Au<sub>23</sub>Cu<sub>2</sub> disappeared after 3 days in water, indicating the instability of Au<sub>23</sub>Cu<sub>2</sub>.

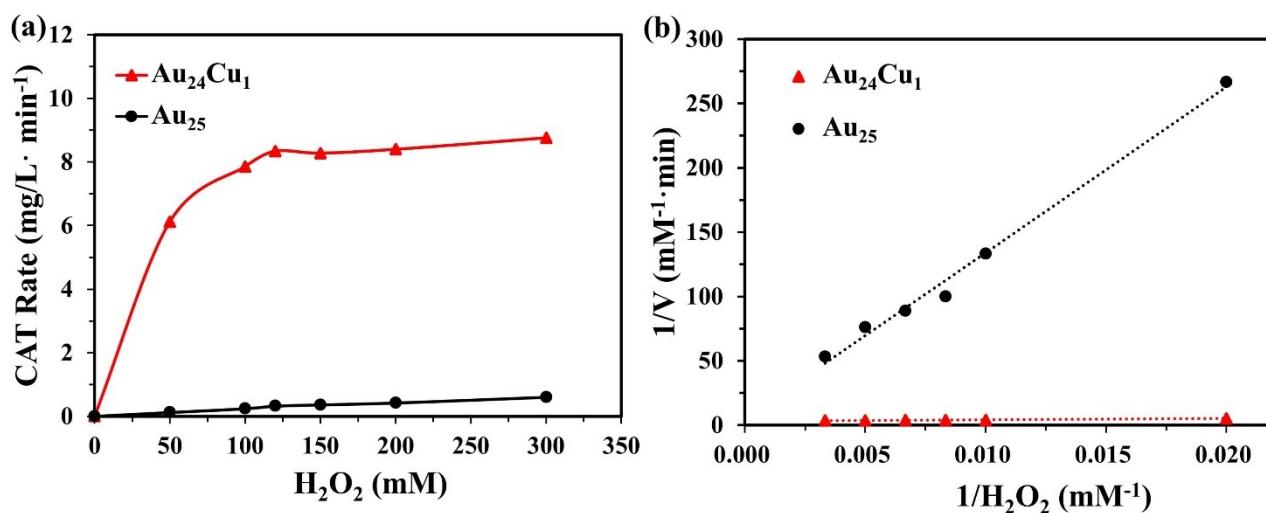

**Fig. S11.** The reaction kinetic analysis of CAT-like activity of Au<sub>25</sub> and Au<sub>24</sub>Cu<sub>1</sub>. (a) Steady-state kinetic assays of AuNCs (0.5 mg/ml) with CAT-like activity versus vary concentration of H<sub>2</sub>O<sub>2</sub> (50–300 mM) at room temperature. (b) Double-reciprocal plots for Au<sub>25</sub> and Au<sub>24</sub>Cu<sub>1</sub> that were generated from Fig. S11a. The maximum reaction velocity ( $V_{\max}$ ) and Michaelis-Menten constant ( $K_m$ ) were calculated using the Lineweaver-Burk equation (shown as Eq. 6).

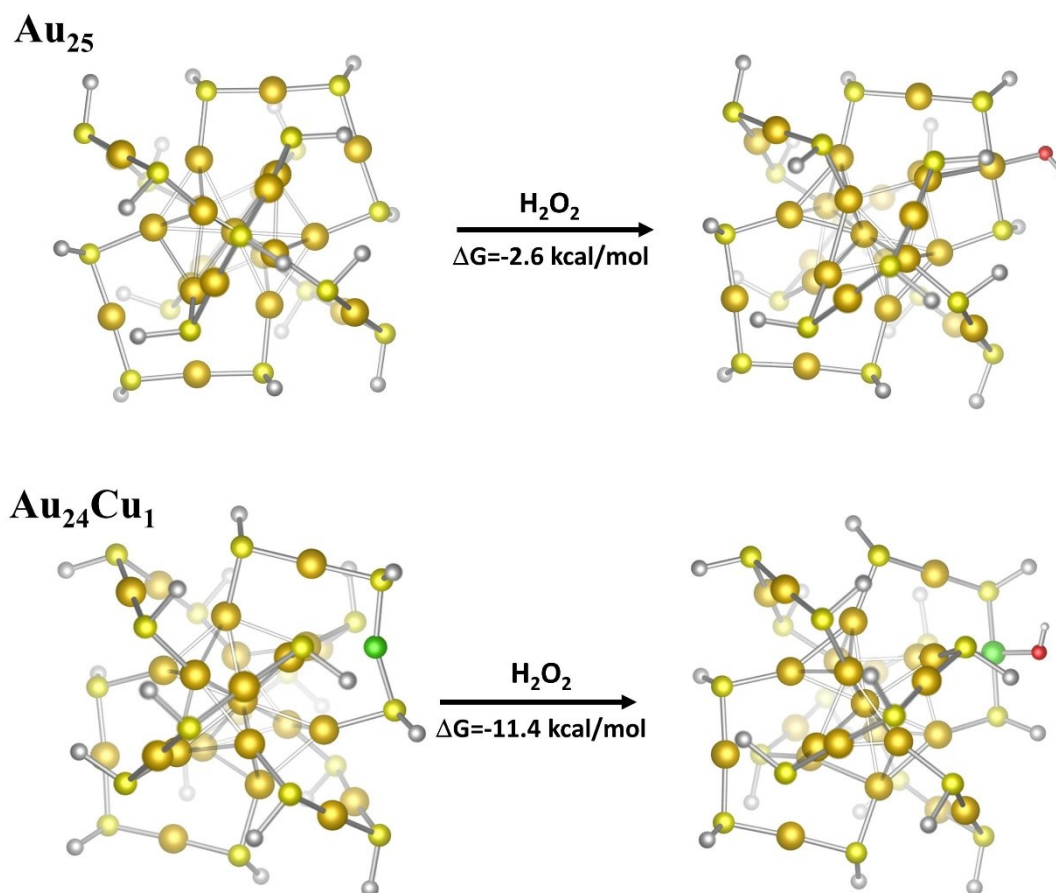

**Fig. S12.** Formation process and Gibbs free energy of M-OH (M represents metal binding site) in Au<sub>25</sub> and Au<sub>24</sub>Cu<sub>1</sub>. To simplify the calculation process, -SMe group replaced the -SR group in MPA ligand. Key: orange = Au; yellow = S; green = Cu; Red = O; dark brown = -Me.

In order to obtain the further view for the CAT-like activity, the density functional theory (DFT) calculation have been performed for the Au<sub>25</sub> and the Au<sub>24</sub>Cu<sub>1</sub>. The critical thermodynamic parameter for the formation of Au-OH in Au<sub>25</sub> and the Cu-OH in Au<sub>24</sub>Cu<sub>1</sub> have been obtained at B3LYP/def2-SVP level.

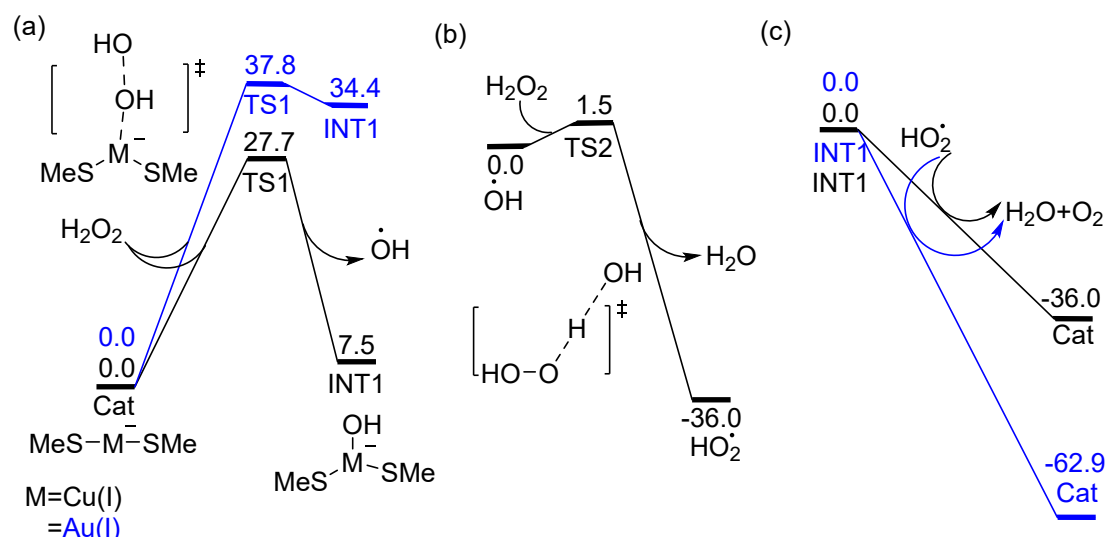

**Fig. S13.** The whole free energy profiles for the CAT-catalyzed reaction:(a) The free energy profile for the activation of  $\text{H}_2\text{O}_2$  (b) The transformation between the  $\text{OH}$  radical and  $\text{H}_2\text{O}_2$  (c) The generation of oxygen and regeneration of the catalyst. Transition state, donated as TS; intermediate, donated as INT.

According to the general mechanism for the generation of oxygen catalyzed by the nanoclusters, we recalculated the whole process at the DLPNO-CCSD(t)/def2TZVP+CPCM (water)//B3LYP/def2SVP level. Based on the structure of the nanocluster, we find out the outer layer with the negative charge, which can be regarded as the active species reacting with the  $\text{H}_2\text{O}_2$ . Hence, the simple model  $\text{M}(\text{SMe})_2$  anion has been chosen to reveal the general process. According to the previous reports, there are three stages for the whole reaction. As shown in Fig. S13a, the  $\text{M}(\text{SMe})_2$  anion can be oxidized by the  $\text{H}_2\text{O}_2$  via the OH shift process. The calculated results show that copper (I) can be oxidized via the free energy barrier of 27.7 kcal/mol, which would be lower than that of gold(I) for 10.1 kcal/mol, indicating that copper(I) can decompose the  $\text{H}_2\text{O}_2$  much faster. As shown in Fig. S13b, the generated  $\text{OH}$  radical can react with another  $\text{H}_2\text{O}_2$  via a low free energy barrier of 1.5 kcal/mol, affording a quite stable  $\text{HO}_2$  radical. At the last stage (Fig. S13c), the intermediate hydroxide metal INT1 could abstract a hydrogen atom from the  $\text{HO}_2$  radical, affording an oxygen and water. Moreover, we find out that the newly generated  $\text{O}_2$  can't form an effectively covalent bond with the metal. So, it could be used in the general degradation of uric acid.

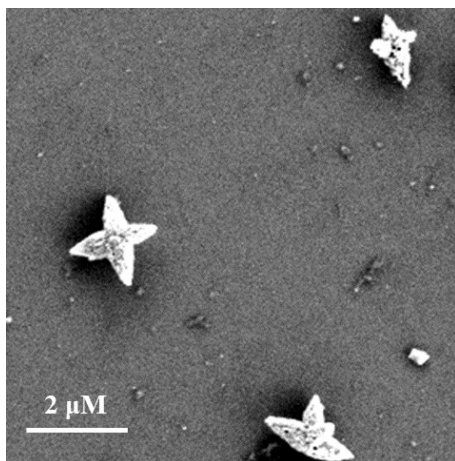

**Fig. S14.** SEM images of UOx@ZIF-8.

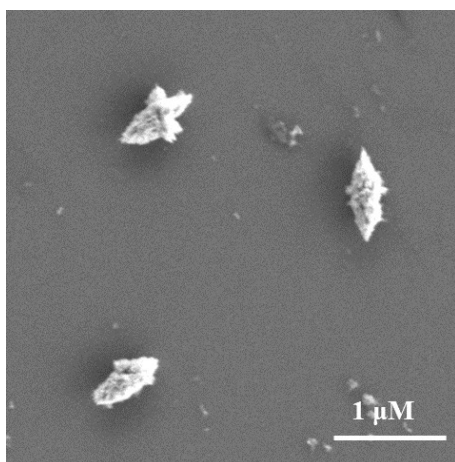

**Fig. S15.** SEM images of UO<sub>x</sub>-Au<sub>24</sub>Cu<sub>1</sub>@ZIF-8.

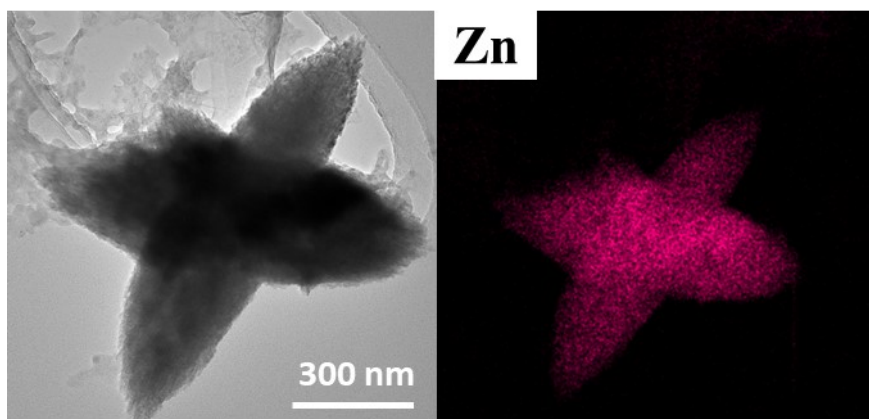

**Fig. S16.** TEM images and Mapping of UO<sub>x</sub>@ZIF-8

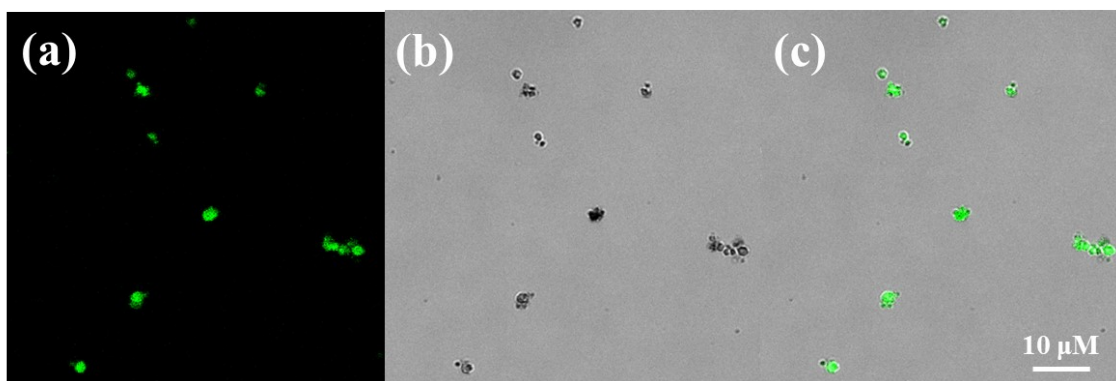

**Fig. S17.** Confocal laser scanning microscopy image of FITC-labelled UOx in UOx-Au<sub>24</sub>Cu<sub>1</sub>@ZIF-8: (a) fluorescent field image of the FITC-UOx, (b) bright-field microscopy image of UOx-Au<sub>24</sub>Cu<sub>1</sub>@ZIF-8, and (c) a merged image of UOx-Au<sub>24</sub>Cu<sub>1</sub>@ZIF-8. For direct visualization, UOx was labeled with fluorescein isothiocyanate (FITC), and then underwent the similar encapsulation process.



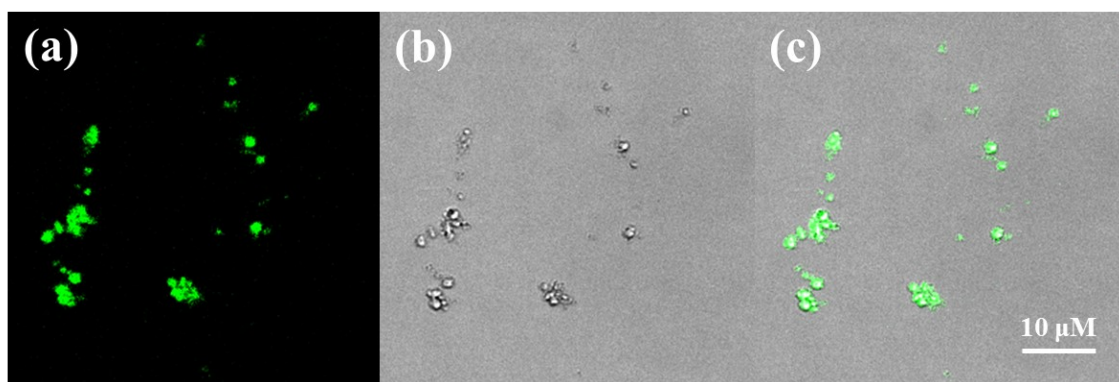

**Fig. S18.** Confocal laser scanning microscopy image of FITC-labelled UOx in UOx@ZIF-8: (a) fluorescent field image of the FITC-UOx, (b) bright-field microscopy image of UOx@ZIF-8, and (c) a merged image of UOx@ZIF-8.

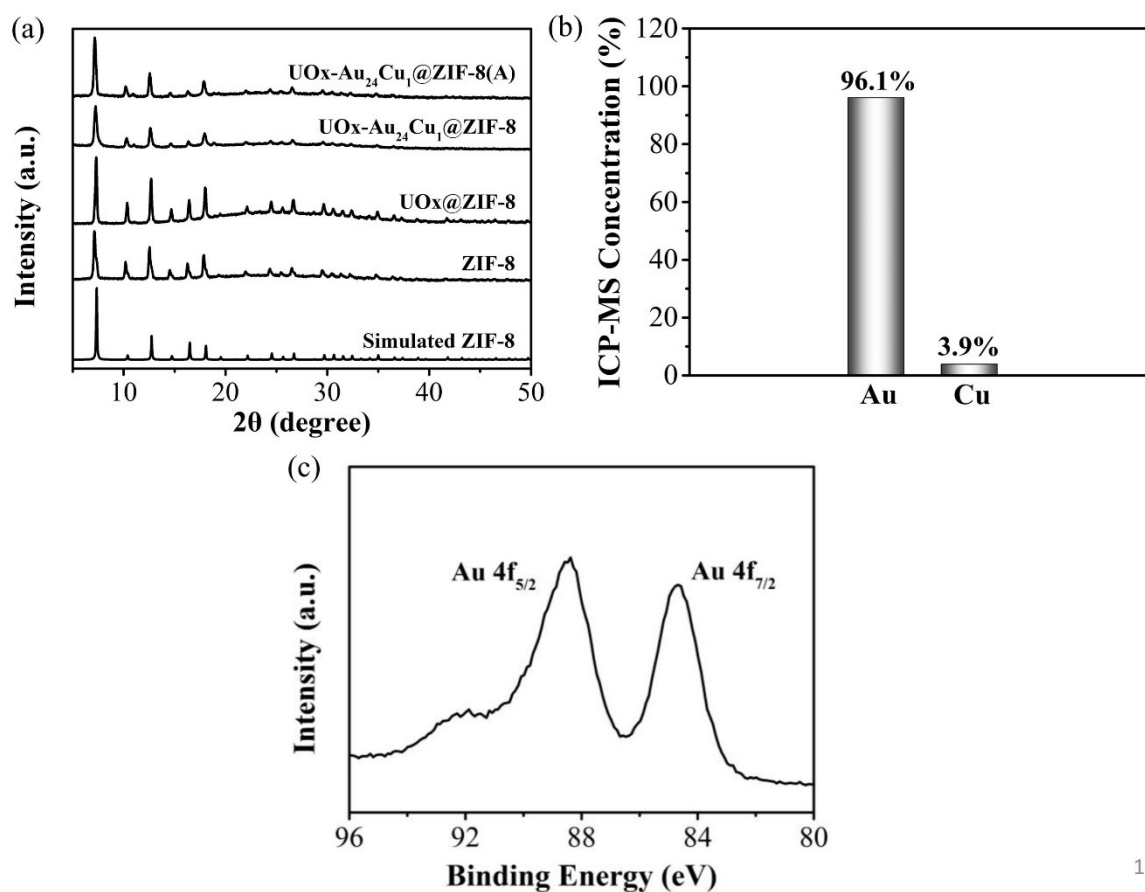

17

**Fig. S19.** (a) The powder X-ray diffraction (PXRD) patterns of simulated ZIF-8, pure ZIF-8, UOx@ZIF-8 and UOx-Au<sub>24</sub>Cu<sub>1</sub>@ZIF-8 composite (UOx-Au<sub>24</sub>Cu<sub>1</sub>@ZIF-8(A) represents that after reaction). The PXRD patterns of UOx@ZIF-8 and UOx-Au<sub>24</sub>Cu<sub>1</sub>@ZIF-8 resembled that of the pure ZIF-8 and simulated one, indicating that the crystallinity of ZIF-8 was not significantly affected by the incorporation of enzyme and nanocluster. (b) ICP-MS of UOx-Au<sub>24</sub>Cu<sub>1</sub>@ZIF-8. The ICP-MS analysis confirmed the presence of Au<sub>24</sub>Cu<sub>1</sub> in UOx-Au<sub>24</sub>Cu<sub>1</sub>@ZIF-8 with the 3.9% ratios of Cu to the total metal belong to Au<sub>24</sub>Cu<sub>1</sub>. (c) X-ray photoelectron spectroscopy. Au 4f region of UOx-Au<sub>24</sub>Cu<sub>1</sub>@ZIF-8 composite.

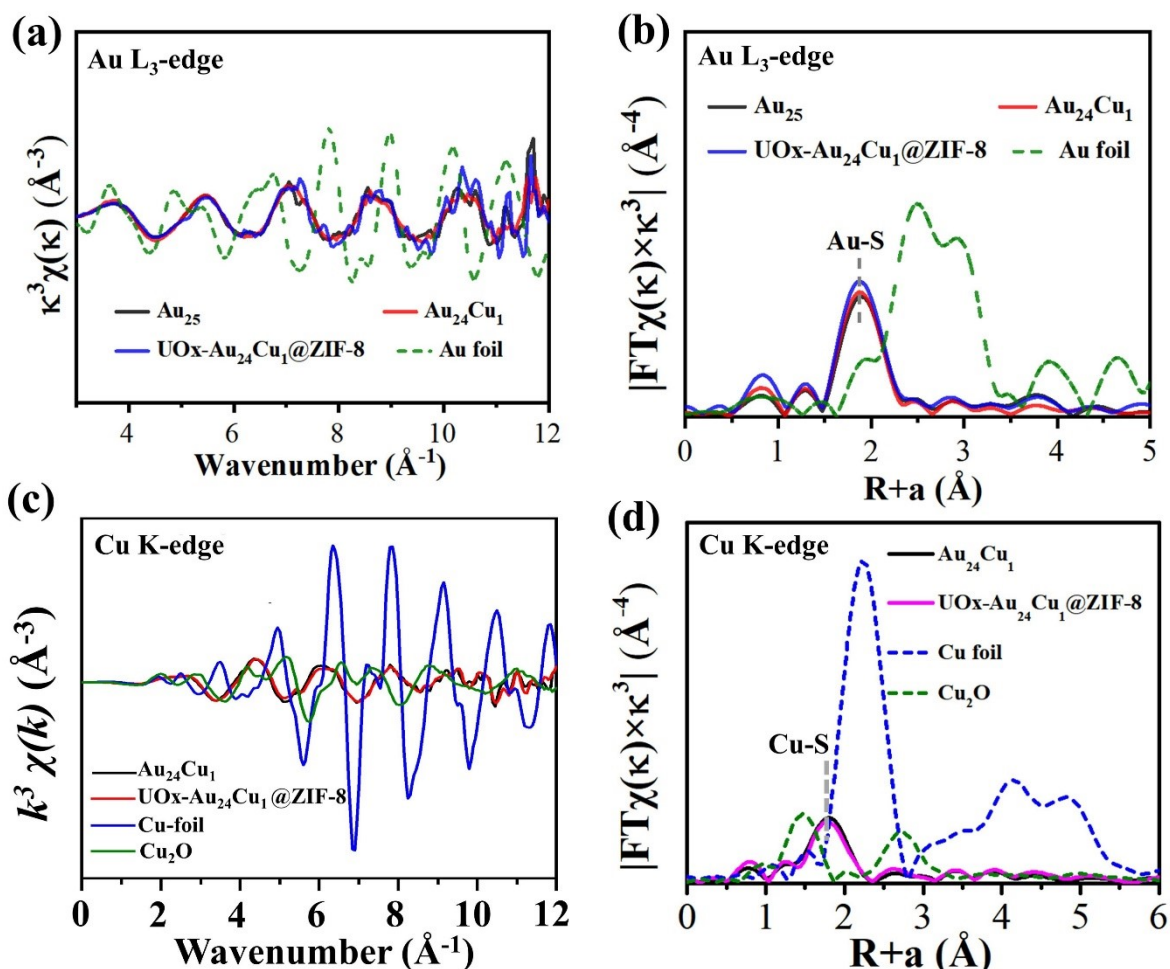

**Fig. S20.** (a) EXAFS K-space spectra of Au<sub>25</sub>, Au<sub>24</sub>Cu<sub>1</sub> and UOx-Au<sub>24</sub>Cu<sub>1</sub>@ZIF-8 with reference Au-foil at Au L<sub>3</sub>-edge. (b) FT-EXAFS spectra in the R-space of Au<sub>25</sub>, Au<sub>24</sub>Cu<sub>1</sub> and UOx-Au<sub>24</sub>Cu<sub>1</sub>@ZIF-8 with reference Au-foil. (c) EXAFS K-space spectra of Au<sub>24</sub>Cu<sub>1</sub> and UOx-Au<sub>24</sub>Cu<sub>1</sub>@ZIF-8 with reference materials at Cu k-edge. (d) FT-EXAFS spectra in the R-space of Au<sub>24</sub>Cu<sub>1</sub> and UOx-Au<sub>24</sub>Cu<sub>1</sub>@ZIF-8 with reference Cu-foil, Cu<sub>2</sub>O.

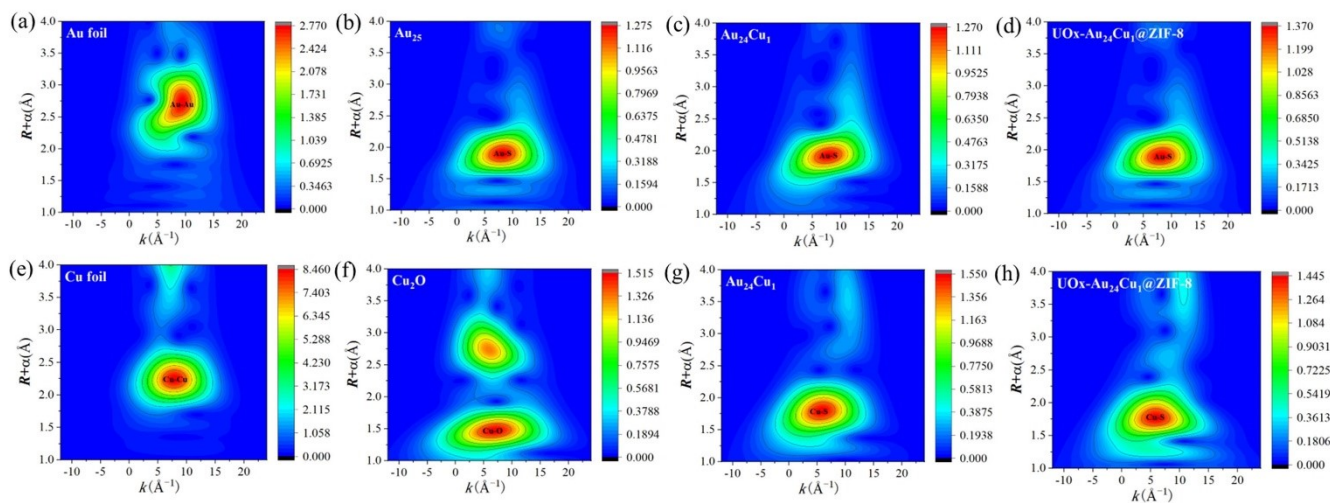

**Fig. S21.** The wavelet transforms analysis of Au  $L_3$ -edge EXAFS for (a) Au foil, (b)  $\text{Au}_{25}$ , (c)  $\text{Au}_{24}\text{Cu}_1$ , (d)  $\text{UOx-Au}_{24}\text{Cu}_1@ZIF-8$ . The wavelet transforms analysis of Cu  $K$ -edge EXAFS for (e) Cu foil, (f)  $\text{Cu}_2\text{O}$ , (g)  $\text{Au}_{24}\text{Cu}_1$ , and (h)  $\text{UOx-Au}_{24}\text{Cu}_1@ZIF-8$ .

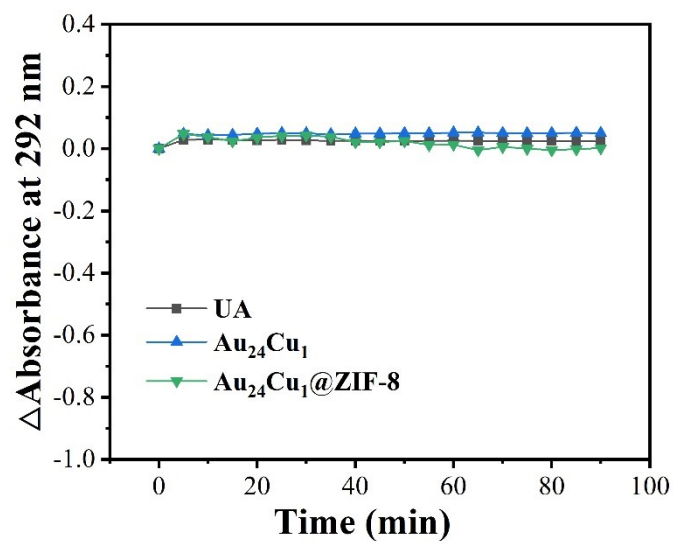

**Fig. S22.** Time evolution of  $\Delta A_{292 \text{ nm}}$  corresponding to the degradation of UA (100  $\mu\text{M}$ ) catalyzed by  $\text{Au}_{24}\text{Cu}_1$  and  $\text{Au}_{24}\text{Cu}_1@\text{ZIF-8}$  ( $\text{Au}_{24}\text{Cu}_1$ : 0.2 mg/mL; UOx: 0.1 mg/mL).

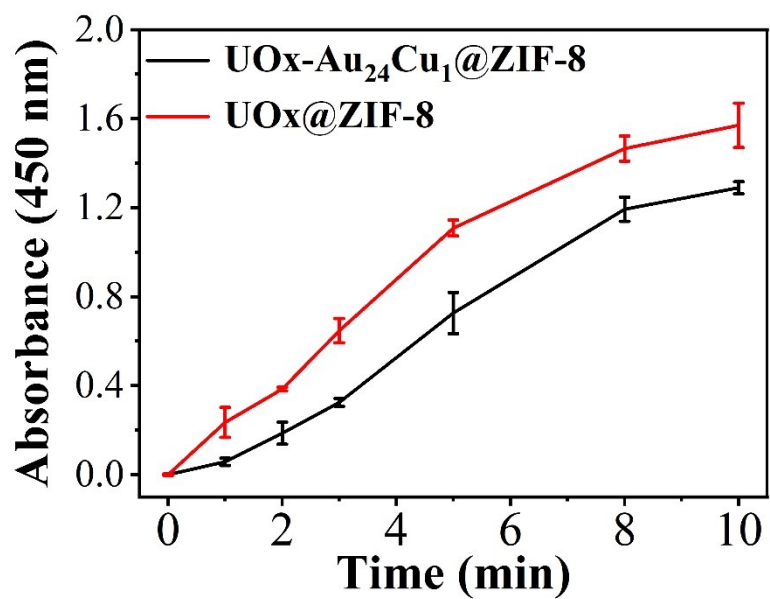

**Fig. S23.** Simultaneous H<sub>2</sub>O<sub>2</sub> generation after UA degradation in the catalytic systems facilitated by UOx@ZIF-8 and UOx-Au<sub>24</sub>Cu<sub>1</sub>@ZIF-8 was monitored by detecting the absorbance changes in TMB at 450 nm under HRP catalysis.

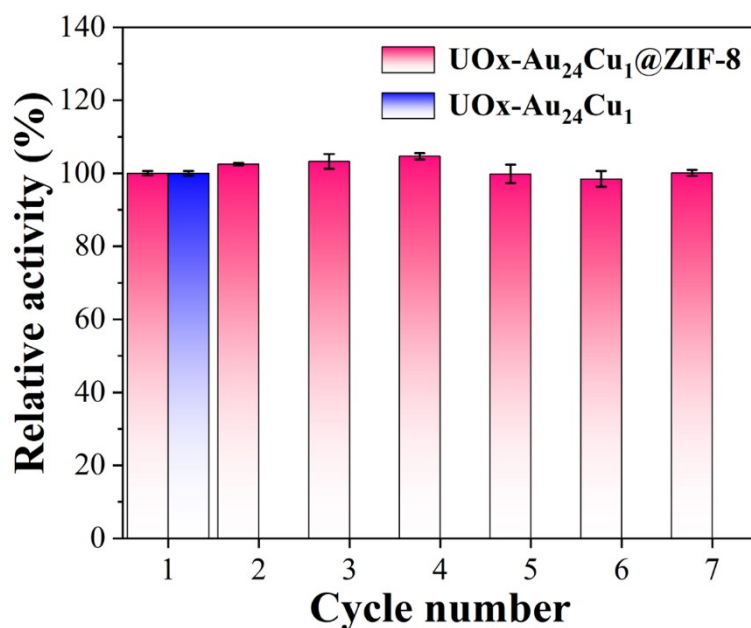

**Fig. S24** Reusability of UO<sub>x</sub>-Au<sub>24</sub>Cu<sub>1</sub>@ZIF-8 and UO<sub>x</sub>-Au<sub>24</sub>Cu<sub>1</sub> in the UA degradation cascade reaction catalytic cycles.

To explore the reusability of the enzyme-nanomaterial cascade system in UA degradation, we have also determined the recycling of UO<sub>x</sub>-Au<sub>24</sub>Cu<sub>1</sub>@ZIF-8 and UO<sub>x</sub>-Au<sub>24</sub>Cu<sub>1</sub>. In recycling tests, UO<sub>x</sub>-Au<sub>24</sub>Cu<sub>1</sub>@ZIF-8 remained nearly 100% of its original catalytic activity after seven cycles, while free UO<sub>x</sub>-Au<sub>24</sub>Cu<sub>1</sub> lost approximately all of its activity after only one catalytic cycles, indicating the excellent reusability of the constructed self-cascade system.

**Table S1. Representative examples of cascade reactions related to UA degradation/detection in different materials**

| Host materials type  | Host materials | Cascade catalytic system | Application    | Advantages of host                                                                                                                                       | Reference |
|----------------------|----------------|--------------------------|----------------|----------------------------------------------------------------------------------------------------------------------------------------------------------|-----------|
| MOFs                 | ZIF-8          | UOX-CAT@ZIF-8-RBC        | UA degradation | Chemical and thermal stability; high enzyme encapsulation efficiency and biocompatible; moderate synthetic condition; pH-sensitive; adjustable pore size | 9         |
|                      |                | UOX-CAT@ZIF-8            | UA degradation |                                                                                                                                                          | 10        |
|                      | PCN-222 (Fe)   | UOx@PCN-222(Fe)          | UA Detection   | Peroxidase-like activity; excellent stability; large surface area and high porosity                                                                      | 11        |
| MOFs                 | HP-DUT-5       | UOx-HRP@HP-DUT-5         | UA Detection   | Large mesopore size; high water and pH stability; high load capacity                                                                                     | 12        |
|                      | Th-MOF         | Uricase/Th-MOF           | UA Detection   | Peroxidase-like activity; stability                                                                                                                      | 13        |
| Noble metal nanozyme | Pd-Ru NSs      | Pd-Ru/Uricase@RBC        | UA degradation | High CAT-like activity; Synthesis under mild reaction conditions                                                                                         | 14        |
| Silica               | silica layer   | MSN-Pt/uricase@Si        | UA degradation | Strong resistance capability                                                                                                                             | 15        |



**Table S2.** Comparison of Comparison of the Kinetic Parameters of Au<sub>25</sub> and Au<sub>24</sub>Cu<sub>1</sub>, Natural Enzymes, and Other CAT Mimic Materials. *K<sub>m</sub>* is the Michaelis constant, *V<sub>max</sub>* is the maximal reaction velocity.

| Catalyst                                  | <i>K<sub>m</sub></i> (mM) | <i>V<sub>max</sub></i> (mM/min) | Reference |
|-------------------------------------------|---------------------------|---------------------------------|-----------|
| Au <sub>24</sub> Cu <sub>1</sub>          | 29.56                     | 0.31                            | This work |
| Au <sub>25</sub>                          | 655.51                    | 0.059                           | This work |
| CAT                                       | 54.3                      | 0.97                            | 16        |
| Pd-Ru (11 nm)                             | 31.02                     | 0.26                            | 14        |
| Pd-Ru (30 nm)                             | 29.42                     | 0.22                            | 14        |
| Multi-caged IrOx NPs                      | 187.95                    | 0.34                            | 17        |
| AgPt NP                                   | 62.98                     | 0.366                           | 18        |
| PVP-PtNCs                                 | 30.62                     | 0.45                            | 19        |
| PVP-PtCuNCs                               | 9.94                      | 1.57                            | 19        |
| N-PCNSs-3                                 | 66.25                     | 0.0162                          | 20        |
| Co <sub>3</sub> O <sub>4</sub>            | 34.3                      | 0.672                           | 16        |
| Co <sub>3</sub> O <sub>4</sub> nanoplates | 52.6                      | 0.143                           | 21        |
| Co <sub>3</sub> O <sub>4</sub> nanorods   | 43.3                      | 0.113                           | 21        |
| Co <sub>3</sub> O <sub>4</sub> nanocubes  | 98.1                      | 0.074                           | 21        |
| Pt-Ft                                     | 420.60                    | 50.4                            | 22        |
| Fe-SAs/NC                                 | 297                       | 0.405                           | 23        |

**Table S3.** Formation process and Gibbs free energy of M-OH in Au<sub>25</sub> and Au<sub>24</sub>Cu<sub>1</sub>

| Species                          | Gibbs free energy (a.u.) | Species                              | Gibbs free energy (a.u.) |
|----------------------------------|--------------------------|--------------------------------------|--------------------------|
| H <sub>2</sub> O <sub>2</sub>    | -151.419092              | Au <sub>25</sub>                     | -11278.97935             |
| H <sub>3</sub> O <sub>3</sub>    | -227.144187              | Au <sub>25</sub> -OH                 | -11354.67744             |
| Au <sub>24</sub> Cu <sub>1</sub> | -12784.14474             | Au <sub>24</sub> Cu <sub>1</sub> -OH | -12859.85694             |

**Table S4.** EXAFS fitting parameters at the Au  $L_3$ -edge or Cu  $K$ -edge for various samples

| Sample                                      | Shell | $R(\text{\AA})^a$ | $\sigma^2(\text{\AA}^2)^b$ | $\Delta E_0(\text{eV})^c$ | $R$ factor |
|---------------------------------------------|-------|-------------------|----------------------------|---------------------------|------------|
| Au                                          |       |                   |                            |                           |            |
| Au-foil                                     | Au-Au | 2.859±0.003       | 0.0080±0.0004              | 3.7±0.3                   | 0.0036     |
| Au <sub>25</sub>                            | Au-S  | 2.307±0.011       | 0.0061±0.0003              | 8.7±1.5                   | 0.0098     |
| Au <sub>24</sub> Cu <sub>1</sub>            | Au-S  | 2.306±0.011       | 0.0052±0.0016              | 8.3±1.4                   | 0.0099     |
| UOx-Au <sub>24</sub> Cu <sub>1</sub> @ZIF-8 | Au-S  | 2.299±0.012       | 0.0011±0.0016              | 8.9±1.9                   | 0.0157     |
| Cu                                          |       |                   |                            |                           |            |
| Cu-foil                                     | Cu-Cu | 2.543±0.003       | 0.0088±0.0004              | 4.3±0.4                   | 0.0021     |
|                                             | Cu-O  | 1.843±0.001       | 0.0023±0.0007              | 6.5±0.9                   |            |
| Cu <sub>2</sub> O                           | Cu-Cu | 3.070±0.001       | 0.0249±0.0012              | 12.8±0.5                  | 0.0064     |
|                                             | Cu-O  | 3.584±0.001       | 0.0078±0.0030              | 4.3±0.4                   |            |
| Au <sub>24</sub> Cu <sub>1</sub>            | Cu-S  | 2.267±0.008       | 0.0125±0.0012              | 1.5±0.6                   | 0.0042     |
| UOx-Au <sub>24</sub> Cu <sub>1</sub> @ZIF-8 | Cu-S  | 2.260±0.014       | 0.0134±0.0024              | 2.1±1.2                   | 0.0169     |

<sup>a</sup> $R$ , the distance to the neighboring atom; <sup>b</sup> $\sigma^2$ , the Mean Square Relative Displacement (MSRD); <sup>c</sup> $\Delta E_0$ , inner potential correction;  $R$  factor indicates the goodness of the fit.

**Table S5.** The coordination for the species in the calculation

|    |              |                               |              |
|----|--------------|-------------------------------|--------------|
|    |              | H <sub>2</sub> O <sub>2</sub> |              |
| 8  | -1.418698000 | 0.370276000                   | 0.198842000  |
| 1  | -1.865640000 | 1.090481000                   | 0.671656000  |
| 8  | -0.062810000 | 0.860918000                   | 0.198795000  |
| 1  | 0.384133000  | 0.140805000                   | 0.671748000  |
|    |              | H <sub>3</sub> O <sub>3</sub> |              |
| 8  | -0.945985000 | 0.095480000                   | 0.647031000  |
| 1  | -2.308760000 | 1.599240000                   | 0.938426000  |
| 8  | 0.184046000  | 0.648656000                   | 0.268582000  |
| 1  | 0.813478000  | -0.093252000                  | 0.136947000  |
| 8  | -3.006087000 | 2.256092000                   | 1.096240000  |
| 1  | -3.757463000 | 1.712166000                   | 1.366552000  |
|    |              | Au <sub>25</sub>              |              |
| 79 | 0.087730000  | 0.024880000                   | -0.076800000 |
| 79 | -0.894550000 | -0.174150000                  | 2.635560000  |
| 79 | -2.201590000 | 1.683320000                   | 0.581730000  |
| 79 | -2.313660000 | -1.521340000                  | 0.440900000  |
| 79 | 2.472650000  | 1.568000000                   | -0.636150000 |
| 79 | -0.280930000 | 2.560420000                   | -1.412250000 |
| 79 | -0.203970000 | -2.324150000                  | -1.813490000 |
| 79 | -1.816640000 | 0.046210000                   | -2.263580000 |
| 79 | 2.424990000  | -1.612200000                  | -0.546770000 |
| 79 | 0.468870000  | 2.394460000                   | 1.597240000  |
| 79 | 1.048040000  | 0.246580000                   | -2.829770000 |
| 79 | 0.355620000  | -2.581800000                  | 1.192550000  |
| 79 | -4.341790000 | -0.146790000                  | 2.880030000  |
| 79 | 2.011360000  | -0.080240000                  | 2.082850000  |
| 79 | 3.506710000  | -3.321090000                  | 2.292120000  |
| 79 | -0.862970000 | -1.738920000                  | -5.052300000 |
| 79 | 2.449050000  | 3.268650000                   | -3.530540000 |
| 79 | -3.538190000 | 3.198480000                   | -2.111600000 |
| 79 | -3.498270000 | -2.835480000                  | -2.703890000 |
| 79 | -2.462740000 | -3.258880000                  | 3.324010000  |
| 79 | 1.948580000  | -4.980230000                  | -0.614080000 |
| 79 | 1.005140000  | 1.714660000                   | 4.881940000  |
| 79 | 4.414550000  | 0.179130000                   | -3.029520000 |
| 79 | 3.584700000  | 2.961240000                   | 2.519800000  |
| 79 | -1.629040000 | 5.042410000                   | 0.471610000  |
| 16 | -4.269470000 | -2.706650000                  | -0.457790000 |
| 16 | 4.325120000  | 2.930590000                   | 0.255960000  |
| 16 | 4.431510000  | 2.194300000                   | -4.303030000 |
| 16 | -3.888520000 | 1.076120000                   | -3.114750000 |
| 16 | 3.586700000  | -1.303850000                  | 3.548360000  |
| 16 | -2.894840000 | -2.981530000                  | -5.000590000 |
| 16 | 1.183790000  | -0.537800000                  | -5.200740000 |
| 16 | -4.417210000 | -2.165770000                  | 4.132580000  |
| 16 | -0.527950000 | -4.439870000                  | 2.611900000  |
| 16 | 0.530610000  | 4.461350000                   | -2.803110000 |
| 16 | 0.433210000  | -4.665890000                  | -2.421090000 |
| 16 | -0.913430000 | 0.322750000                   | 5.069340000  |
| 16 | 3.547140000  | -5.380180000                  | 1.105490000  |
| 16 | 2.848980000  | 3.224100000                   | 4.771170000  |
| 16 | -4.366300000 | 1.939600000                   | 1.742860000  |
| 16 | -3.353420000 | 5.366840000                   | -1.145190000 |
| 16 | 4.390040000  | -1.955920000                  | -1.980480000 |

|    |              |              |              |
|----|--------------|--------------|--------------|
| 16 | 0.218540000  | 4.850630000  | 1.956120000  |
| 6  | 2.764750000  | -6.585920000 | 2.257830000  |
| 1  | 2.613830000  | -7.527710000 | 1.712970000  |
| 1  | 3.459080000  | -6.752140000 | 3.092710000  |
| 1  | 1.807380000  | -6.208940000 | 2.640370000  |
| 6  | -1.216480000 | -5.664110000 | 1.418840000  |
| 1  | -0.373890000 | -6.125290000 | 0.884170000  |
| 1  | -1.763880000 | -6.432000000 | 1.982270000  |
| 1  | -1.886000000 | -5.185820000 | 0.693610000  |
| 6  | 5.295820000  | -0.672800000 | 3.294790000  |
| 1  | 5.624120000  | -0.803970000 | 2.257270000  |
| 1  | 5.311250000  | 0.395480000  | 3.551880000  |
| 1  | 5.971390000  | -1.225180000 | 3.962890000  |
| 6  | 5.891880000  | -2.055330000 | -0.926510000 |
| 1  | 6.770530000  | -2.134230000 | -1.581580000 |
| 1  | 5.992410000  | -1.176700000 | -0.278640000 |
| 1  | 5.809730000  | -2.961400000 | -0.310700000 |
| 6  | 5.819020000  | 1.859810000  | 0.255060000  |
| 1  | 6.067330000  | 1.622250000  | -0.788910000 |
| 1  | 6.646950000  | 2.417140000  | 0.715180000  |
| 1  | 5.646450000  | 0.930310000  | 0.808240000  |
| 6  | -4.921910000 | 5.550340000  | -0.196800000 |
| 1  | -5.112550000 | 4.676370000  | 0.438850000  |
| 1  | -4.845880000 | 6.458020000  | 0.417200000  |
| 1  | -5.741110000 | 5.665250000  | -0.919660000 |
| 6  | -0.561160000 | 4.578710000  | -4.278750000 |
| 1  | -1.514770000 | 5.016680000  | -3.952910000 |
| 1  | -0.085690000 | 5.240330000  | -5.015710000 |
| 1  | -0.744750000 | 3.594740000  | -4.727910000 |
| 6  | -0.443700000 | 5.155670000  | 3.644920000  |
| 1  | 0.383180000  | 5.014400000  | 4.354110000  |
| 1  | -0.796880000 | 6.194730000  | 3.697450000  |
| 1  | -1.261890000 | 4.470040000  | 3.895370000  |
| 6  | 4.136770000  | 2.453620000  | 5.837230000  |
| 1  | 4.289090000  | 1.396090000  | 5.588770000  |
| 1  | 5.073240000  | 3.012240000  | 5.704610000  |
| 1  | 3.803900000  | 2.540810000  | 6.880580000  |
| 6  | -0.288780000 | -1.198690000 | 5.899090000  |
| 1  | 0.642630000  | -1.554100000 | 5.441450000  |
| 1  | -0.120780000 | -0.970850000 | 6.960540000  |
| 1  | -1.063600000 | -1.972270000 | 5.804900000  |
| 6  | 5.786580000  | 3.234600000  | -3.613930000 |
| 1  | 5.792580000  | 4.183740000  | -4.167000000 |
| 1  | 5.637490000  | 3.434810000  | -2.545380000 |
| 1  | 6.738940000  | 2.711470000  | -3.775400000 |
| 6  | 0.844250000  | 0.893600000  | -6.304240000 |
| 1  | -0.035310000 | 1.460950000  | -5.975630000 |
| 1  | 1.728520000  | 1.545600000  | -6.285560000 |
| 1  | 0.683990000  | 0.520030000  | -7.324920000 |
| 6  | 1.553310000  | -4.517500000 | -3.876590000 |
| 1  | 0.952460000  | -4.178450000 | -4.732210000 |
| 1  | 2.361580000  | -3.799100000 | -3.691950000 |
| 1  | 1.977610000  | -5.508020000 | -4.090510000 |
| 6  | -3.674690000 | 1.317270000  | -4.925660000 |
| 1  | -4.513730000 | 1.921350000  | -5.297330000 |
| 1  | -2.726660000 | 1.817670000  | -5.157990000 |
| 1  | -3.694320000 | 0.326710000  | -5.400430000 |
| 6  | -2.397110000 | -4.738110000 | -5.247270000 |
| 1  | -3.302380000 | -5.355880000 | -5.172610000 |
| 1  | -1.969510000 | -4.833970000 | -6.254550000 |

|   |              |              |              |
|---|--------------|--------------|--------------|
| 1 | -1.667290000 | -5.056450000 | -4.491680000 |
| 6 | -4.012080000 | 3.140590000  | 3.094390000  |
| 1 | -4.913440000 | 3.237590000  | 3.715110000  |
| 1 | -3.171060000 | 2.807820000  | 3.714910000  |
| 1 | -3.770330000 | 4.109100000  | 2.634330000  |
| 6 | -5.794170000 | -3.145570000 | 3.396690000  |
| 1 | -5.822720000 | -4.119340000 | 3.904490000  |
| 1 | -6.733620000 | -2.607960000 | 3.583860000  |
| 1 | -5.651480000 | -3.294310000 | 2.318800000  |
| 6 | -5.636700000 | -1.475830000 | -0.543850000 |
| 1 | -6.505620000 | -1.965470000 | -1.004880000 |
| 1 | -5.882370000 | -1.168720000 | 0.482450000  |
| 1 | -5.349440000 | -0.597730000 | -1.135000000 |

Au<sub>25</sub>-OH

|    |              |              |              |
|----|--------------|--------------|--------------|
| 79 | 0.169584000  | -0.078751000 | 0.111654000  |
| 79 | -1.029555000 | -0.402311000 | 2.674342000  |
| 79 | -2.166158000 | 1.701642000  | 0.739847000  |
| 79 | -2.330868000 | -1.466556000 | 0.414327000  |
| 79 | 2.663597000  | 1.261138000  | -0.384358000 |
| 79 | -0.055022000 | 2.617471000  | -1.043247000 |
| 79 | -0.168300000 | -2.494398000 | -1.534332000 |
| 79 | -1.862021000 | 0.552022000  | -1.908635000 |
| 79 | 2.488431000  | -1.702793000 | -0.523065000 |
| 79 | 0.521833000  | 2.494716000  | 1.924746000  |
| 79 | 1.230272000  | 0.189628000  | -2.543171000 |
| 79 | 0.274774000  | -2.717236000 | 1.311253000  |
| 79 | -4.289815000 | -0.272936000 | 3.079777000  |
| 79 | 2.081104000  | 0.310025000  | 2.548909000  |
| 79 | 3.442420000  | -3.372570000 | 2.079705000  |
| 79 | -1.059123000 | -1.695689000 | -4.826743000 |
| 79 | 2.770010000  | 3.137820000  | -3.253205000 |
| 79 | -3.935329000 | 3.190312000  | -2.125055000 |
| 79 | -3.636249000 | -2.845225000 | -2.638625000 |
| 79 | -2.360356000 | -3.417110000 | 3.534895000  |
| 79 | 1.921613000  | -5.089596000 | -0.777142000 |
| 79 | 1.006030000  | 2.002116000  | 4.650342000  |
| 79 | 4.567559000  | -0.127733000 | -3.003928000 |
| 79 | 3.774013000  | 3.037439000  | 2.429103000  |
| 79 | -2.092741000 | 4.986009000  | 0.462530000  |
| 16 | -4.328055000 | -2.652659000 | -0.384852000 |
| 16 | 4.626623000  | 2.626165000  | 0.248942000  |
| 16 | 4.601835000  | 1.935724000  | -4.202444000 |
| 16 | -3.860475000 | 1.083272000  | -3.221280000 |
| 16 | 3.353842000  | -1.532877000 | 3.560601000  |
| 16 | -3.057879000 | -2.976025000 | -4.936013000 |
| 16 | 0.959443000  | -0.463455000 | -4.877005000 |
| 16 | -4.376834000 | -2.357167000 | 4.228124000  |
| 16 | -0.363225000 | -4.543897000 | 2.881208000  |
| 16 | 1.041457000  | 4.456928000  | -2.296777000 |
| 16 | 0.294078000  | -4.734698000 | -2.480260000 |
| 16 | -0.878165000 | 0.499189000  | 4.928394000  |
| 16 | 3.647375000  | -5.393695000 | 0.825263000  |
| 16 | 2.763392000  | 3.657091000  | 4.477162000  |
| 16 | -4.280557000 | 1.878662000  | 2.060013000  |
| 16 | -3.978877000 | 5.263869000  | -0.977944000 |
| 16 | 4.435591000  | -2.274415000 | -1.980918000 |
| 16 | -0.129066000 | 4.946319000  | 1.784792000  |
| 6  | 3.070078000  | -6.690463000 | 2.000074000  |
| 1  | 2.952231000  | -7.629652000 | 1.442806000  |

|   |              |              |              |
|---|--------------|--------------|--------------|
| 1 | 3.845253000  | -6.814389000 | 2.768491000  |
| 1 | 2.122000000  | -6.408187000 | 2.475095000  |
| 6 | -1.005606000 | -5.855800000 | 1.754776000  |
| 1 | -0.153234000 | -6.280814000 | 1.205561000  |
| 1 | -1.479952000 | -6.637091000 | 2.364510000  |
| 1 | -1.730656000 | -5.453932000 | 1.036454000  |
| 6 | 5.088897000  | -0.975943000 | 3.798618000  |
| 1 | 5.575905000  | -0.727959000 | 2.847873000  |
| 1 | 5.070397000  | -0.087247000 | 4.443864000  |
| 1 | 5.646545000  | -1.778953000 | 4.299594000  |
| 6 | 5.955417000  | -2.490618000 | -0.970596000 |
| 1 | 6.820176000  | -2.550805000 | -1.645833000 |
| 1 | 6.094515000  | -1.664327000 | -0.262967000 |
| 1 | 5.855215000  | -3.435046000 | -0.418126000 |
| 6 | 5.992523000  | 1.412673000  | 0.455976000  |
| 1 | 6.279278000  | 1.062952000  | -0.546045000 |
| 1 | 6.845295000  | 1.916555000  | 0.931251000  |
| 1 | 5.680673000  | 0.554288000  | 1.062473000  |
| 6 | -5.456227000 | 5.142772000  | 0.117801000  |
| 1 | -5.448984000 | 4.212207000  | 0.699878000  |
| 1 | -5.450566000 | 6.012295000  | 0.789164000  |
| 1 | -6.350813000 | 5.178374000  | -0.518534000 |
| 6 | -0.095038000 | 4.918447000  | -3.667380000 |
| 1 | -0.951736000 | 5.444962000  | -3.224509000 |
| 1 | 0.436472000  | 5.594618000  | -4.350892000 |
| 1 | -0.450788000 | 4.039338000  | -4.218797000 |
| 6 | -0.650207000 | 5.421908000  | 3.485350000  |
| 1 | 0.235222000  | 5.349841000  | 4.131770000  |
| 1 | -1.006511000 | 6.460929000  | 3.464488000  |
| 1 | -1.439104000 | 4.765735000  | 3.871800000  |
| 6 | 3.848243000  | 3.181593000  | 5.881022000  |
| 1 | 4.422431000  | 2.274949000  | 5.655851000  |
| 1 | 4.530091000  | 4.022814000  | 6.067789000  |
| 1 | 3.181187000  | 3.012309000  | 6.738109000  |
| 6 | -0.128414000 | -0.778863000 | 6.016551000  |
| 1 | 0.663946000  | -1.327748000 | 5.492110000  |
| 1 | 0.292937000  | -0.261299000 | 6.887574000  |
| 1 | -0.930205000 | -1.470603000 | 6.309319000  |
| 6 | 6.072863000  | 2.854187000  | -3.579352000 |
| 1 | 6.105500000  | 3.823751000  | -4.094915000 |
| 1 | 6.015109000  | 3.016927000  | -2.495535000 |
| 1 | 6.971336000  | 2.275026000  | -3.831888000 |
| 6 | 0.589118000  | 1.060946000  | -5.837019000 |
| 1 | -0.274604000 | 1.596250000  | -5.426106000 |
| 1 | 1.477618000  | 1.705386000  | -5.794024000 |
| 1 | 0.390154000  | 0.772259000  | -6.878031000 |
| 6 | 1.353258000  | -4.473587000 | -3.967247000 |
| 1 | 0.723313000  | -4.060326000 | -4.767198000 |
| 1 | 2.181327000  | -3.785626000 | -3.757097000 |
| 1 | 1.751584000  | -5.450185000 | -4.274883000 |
| 6 | -3.387795000 | 1.440661000  | -4.961771000 |
| 1 | -4.276298000 | 1.824711000  | -5.481708000 |
| 1 | -2.580453000 | 2.180208000  | -5.019090000 |
| 1 | -3.066446000 | 0.498153000  | -5.426761000 |
| 6 | -2.524479000 | -4.718629000 | -5.211743000 |
| 1 | -3.422068000 | -5.350757000 | -5.173161000 |
| 1 | -2.072951000 | -4.784798000 | -6.210971000 |
| 1 | -1.808670000 | -5.045247000 | -4.446968000 |
| 6 | -3.916996000 | 3.010484000  | 3.465768000  |
| 1 | -4.789493000 | 3.033895000  | 4.132838000  |

|   |              |              |              |
|---|--------------|--------------|--------------|
| 1 | -3.032778000 | 2.681542000  | 4.025820000  |
| 1 | -3.742476000 | 4.012885000  | 3.049886000  |
| 6 | -5.694414000 | -3.331270000 | 3.384687000  |
| 1 | -5.725230000 | -4.327287000 | 3.847016000  |
| 1 | -6.652700000 | -2.820843000 | 3.551580000  |
| 1 | -5.498588000 | -3.425913000 | 2.308716000  |
| 6 | -5.673347000 | -1.394916000 | -0.460075000 |
| 1 | -6.561494000 | -1.869057000 | -0.899361000 |
| 1 | -5.891619000 | -1.072816000 | 0.567876000  |
| 1 | -5.378785000 | -0.528478000 | -1.064251000 |
| 8 | 1.144336000  | 2.142733000  | 6.743327000  |
| 1 | 0.233982000  | 2.253878000  | 7.057417000  |

Au<sub>24</sub>Cu<sub>1</sub>

|    |              |              |              |
|----|--------------|--------------|--------------|
| 79 | 0.097886000  | 0.023068000  | -0.080472000 |
| 79 | -0.995773000 | -0.297240000 | 2.586134000  |
| 79 | -2.259770000 | 1.663826000  | 0.467822000  |
| 79 | -2.364854000 | -1.454921000 | 0.345960000  |
| 79 | 2.516024000  | 1.503818000  | -0.565325000 |
| 79 | -0.264444000 | 2.539755000  | -1.458848000 |
| 79 | -0.294130000 | -2.252244000 | -1.811770000 |
| 79 | -1.865223000 | 0.092684000  | -2.189990000 |
| 79 | 2.530849000  | -1.512070000 | -0.373411000 |
| 79 | 0.568477000  | 2.377445000  | 1.567531000  |
| 79 | 1.076955000  | 0.323850000  | -2.802539000 |
| 79 | 0.302655000  | -2.538063000 | 1.260129000  |
| 79 | -4.346050000 | -0.230729000 | 2.907230000  |
| 79 | 2.030443000  | -0.052462000 | 2.064390000  |
| 79 | 3.554070000  | -3.252309000 | 2.341685000  |
| 79 | -0.959339000 | -1.724231000 | -5.035149000 |
| 79 | 2.443114000  | 3.322194000  | -3.488515000 |
| 79 | -3.550086000 | 3.140651000  | -2.135287000 |
| 79 | -3.628571000 | -2.837357000 | -2.710794000 |
| 79 | -2.460270000 | -3.363031000 | 3.312884000  |
| 79 | 2.012637000  | -4.848582000 | -0.577820000 |
| 79 | 1.024318000  | 1.821301000  | 4.744727000  |
| 79 | 4.396677000  | 0.164065000  | -3.062407000 |
| 79 | 3.726225000  | 2.993167000  | 2.457587000  |
| 16 | -4.362673000 | -2.740382000 | -0.462273000 |
| 16 | 4.467599000  | 2.902030000  | 0.209684000  |
| 16 | 4.395699000  | 2.212933000  | -4.287345000 |
| 16 | -3.938777000 | 1.060285000  | -3.191538000 |
| 16 | 3.529338000  | -1.286364000 | 3.658318000  |
| 16 | -3.004332000 | -2.950268000 | -5.003085000 |
| 16 | 1.112643000  | -0.582594000 | -5.134596000 |
| 16 | -4.411577000 | -2.272507000 | 4.120809000  |
| 16 | -0.488378000 | -4.487547000 | 2.646723000  |
| 16 | 0.560933000  | 4.533548000  | -2.710674000 |
| 16 | 0.441126000  | -4.545128000 | -2.322659000 |
| 16 | -0.957271000 | 0.535215000  | 4.930687000  |
| 16 | 3.659144000  | -5.269620000 | 1.088633000  |
| 16 | 2.850771000  | 3.353549000  | 4.640296000  |
| 16 | -4.358444000 | 1.868963000  | 1.806034000  |
| 16 | -3.218596000 | 5.245230000  | -1.076054000 |
| 16 | 4.263602000  | -1.991732000 | -2.079936000 |
| 16 | 0.138605000  | 4.766050000  | 1.764915000  |
| 6  | 2.882419000  | -6.530642000 | 2.229492000  |
| 1  | 2.747171000  | -7.460721000 | 1.660847000  |
| 1  | 3.588988000  | -6.703561000 | 3.052827000  |
| 1  | 1.921465000  | -6.185717000 | 2.632514000  |



|   |              |              |              |
|---|--------------|--------------|--------------|
| 6 | -1.151138000 | -5.717330000 | 1.401437000  |
| 1 | -0.299573000 | -6.167574000 | 0.871484000  |
| 1 | -1.701028000 | -6.496154000 | 1.947330000  |
| 1 | -1.814494000 | -5.234261000 | 0.673617000  |
| 6 | 5.264241000  | -0.618276000 | 3.476298000  |
| 1 | 5.635259000  | -0.720250000 | 2.449724000  |
| 1 | 5.262661000  | 0.444139000  | 3.756039000  |
| 1 | 5.916532000  | -1.182286000 | 4.157512000  |
| 6 | 5.860348000  | -2.233625000 | -1.149915000 |
| 1 | 6.674266000  | -2.307700000 | -1.884406000 |
| 1 | 6.060178000  | -1.407357000 | -0.457261000 |
| 1 | 5.784164000  | -3.175673000 | -0.589660000 |
| 6 | 5.899813000  | 1.703893000  | 0.245872000  |
| 1 | 6.193173000  | 1.482107000  | -0.790157000 |
| 1 | 6.740078000  | 2.176633000  | 0.772933000  |
| 1 | 5.622818000  | 0.770337000  | 0.749665000  |
| 6 | -4.735701000 | 5.447636000  | -0.025205000 |
| 1 | -4.960970000 | 4.535420000  | 0.542531000  |
| 1 | -4.557942000 | 6.286364000  | 0.662465000  |
| 1 | -5.585956000 | 5.689368000  | -0.677327000 |
| 6 | -0.554863000 | 4.703824000  | -4.198045000 |
| 1 | -1.504014000 | 5.140642000  | -3.858072000 |
| 1 | -0.073467000 | 5.381868000  | -4.915954000 |
| 1 | -0.746898000 | 3.734245000  | -4.673603000 |
| 6 | -0.568063000 | 5.119451000  | 3.444900000  |
| 1 | 0.247677000  | 5.085729000  | 4.179436000  |
| 1 | -1.001923000 | 6.129496000  | 3.429136000  |
| 1 | -1.337735000 | 4.391095000  | 3.724578000  |
| 6 | 4.104089000  | 2.628838000  | 5.814937000  |
| 1 | 4.273489000  | 1.561238000  | 5.629228000  |
| 1 | 5.044501000  | 3.185244000  | 5.702016000  |
| 1 | 3.718093000  | 2.766809000  | 6.834287000  |
| 6 | -0.417552000 | -0.944030000 | 5.936264000  |
| 1 | 0.515744000  | -1.372531000 | 5.550782000  |
| 1 | -0.279370000 | -0.621348000 | 6.977366000  |
| 1 | -1.218436000 | -1.694228000 | 5.884036000  |
| 6 | 5.773322000  | 3.228812000  | -3.538002000 |
| 1 | 5.794610000  | 4.190388000  | -4.068989000 |
| 1 | 5.621170000  | 3.404789000  | -2.465298000 |
| 1 | 6.718612000  | 2.695916000  | -3.709192000 |
| 6 | 0.810984000  | 0.853051000  | -6.288178000 |
| 1 | -0.061760000 | 1.444626000  | -5.985518000 |
| 1 | 1.708676000  | 1.486481000  | -6.270514000 |
| 1 | 0.658116000  | 0.458833000  | -7.302271000 |
| 6 | 1.534219000  | -4.407547000 | -3.835145000 |
| 1 | 0.914757000  | -4.074256000 | -4.679291000 |
| 1 | 2.343648000  | -3.687381000 | -3.664163000 |
| 1 | 1.956388000  | -5.398612000 | -4.051487000 |
| 6 | -3.611816000 | 1.341116000  | -5.006954000 |
| 1 | -4.411999000 | 1.973264000  | -5.415738000 |
| 1 | -2.639765000 | 1.822027000  | -5.171736000 |
| 1 | -3.625670000 | 0.361456000  | -5.504432000 |
| 6 | -2.472094000 | -4.729024000 | -5.231029000 |
| 1 | -3.369938000 | -5.357994000 | -5.159547000 |
| 1 | -2.040927000 | -4.818704000 | -6.237421000 |
| 1 | -1.740257000 | -5.041174000 | -4.475071000 |
| 6 | -3.916247000 | 3.028314000  | 3.200628000  |
| 1 | -4.796236000 | 3.106584000  | 3.853914000  |
| 1 | -3.061373000 | 2.656169000  | 3.778792000  |
| 1 | -3.682497000 | 4.016131000  | 2.780226000  |

|    |              |              |              |
|----|--------------|--------------|--------------|
| 6  | -5.772286000 | -3.255809000 | 3.299716000  |
| 1  | -5.804337000 | -4.236603000 | 3.793630000  |
| 1  | -6.720102000 | -2.728062000 | 3.472762000  |
| 1  | -5.601315000 | -3.386738000 | 2.223460000  |
| 6  | -5.738140000 | -1.470202000 | -0.530467000 |
| 1  | -6.612426000 | -1.939486000 | -1.002105000 |
| 1  | -5.988258000 | -1.166368000 | 0.496023000  |
| 1  | -5.433853000 | -0.590256000 | -1.110656000 |
| 29 | -1.576000000 | 4.604677000  | 0.318275000  |

Au<sub>24</sub>Cu<sub>1</sub>-OH

|    |              |              |              |
|----|--------------|--------------|--------------|
| 79 | 0.026668000  | 0.119075000  | 0.004819000  |
| 79 | -0.906744000 | -0.311969000 | 2.706924000  |
| 79 | -2.298424000 | 1.965885000  | 0.490802000  |
| 79 | -2.386962000 | -1.539821000 | 0.434862000  |
| 79 | 2.446920000  | 1.674762000  | -0.566887000 |
| 79 | -0.374376000 | 2.924855000  | -1.259033000 |
| 79 | -0.389880000 | -2.133234000 | -1.729075000 |
| 79 | -2.040271000 | 0.121012000  | -2.049817000 |
| 79 | 2.608044000  | -1.280591000 | -0.175473000 |
| 79 | 0.592185000  | 2.468961000  | 1.597345000  |
| 79 | 0.762370000  | 0.714026000  | -2.762860000 |
| 79 | 0.246412000  | -2.513451000 | 1.297224000  |
| 79 | -4.137451000 | -0.370130000 | 2.940283000  |
| 79 | 2.029831000  | 0.111366000  | 2.190622000  |
| 79 | 3.534314000  | -3.156941000 | 2.341184000  |
| 79 | -1.058681000 | -1.572245000 | -4.919135000 |
| 79 | 2.601747000  | 3.286003000  | -3.460711000 |
| 79 | -3.479096000 | 3.213813000  | -2.291214000 |
| 79 | -3.682160000 | -2.832580000 | -2.613124000 |
| 79 | -2.296688000 | -3.500866000 | 3.342664000  |
| 79 | 2.050050000  | -4.665715000 | -0.630197000 |
| 79 | 1.038808000  | 1.929541000  | 4.765249000  |
| 79 | 4.353095000  | 0.125496000  | -3.008910000 |
| 79 | 3.748152000  | 3.026622000  | 2.502046000  |
| 16 | -4.406543000 | -2.776694000 | -0.346956000 |
| 16 | 4.513292000  | 2.867390000  | 0.252456000  |
| 16 | 4.535625000  | 2.135707000  | -4.254632000 |
| 16 | -4.133753000 | 1.049961000  | -2.994615000 |
| 16 | 3.450512000  | -1.249915000 | 3.745353000  |
| 16 | -3.078374000 | -2.840318000 | -4.917584000 |
| 16 | 0.954747000  | -0.310367000 | -5.023831000 |
| 16 | -4.221779000 | -2.399773000 | 4.191895000  |
| 16 | -0.330331000 | -4.597690000 | 2.574780000  |
| 16 | 0.776609000  | 4.611949000  | -2.761930000 |
| 16 | 0.436063000  | -4.356875000 | -2.341807000 |
| 16 | -0.919313000 | 0.593921000  | 4.990004000  |
| 16 | 3.727207000  | -5.111292000 | 1.000120000  |
| 16 | 2.907604000  | 3.409723000  | 4.696781000  |
| 16 | -4.253064000 | 1.772156000  | 1.924429000  |
| 16 | -2.799887000 | 5.361457000  | -1.619869000 |
| 16 | 4.120679000  | -1.979335000 | -1.939706000 |
| 16 | 0.153491000  | 4.822557000  | 1.690509000  |
| 6  | 3.076239000  | -6.473577000 | 2.054898000  |
| 1  | 2.989732000  | -7.373835000 | 1.431545000  |
| 1  | 3.802044000  | -6.652001000 | 2.859895000  |
| 1  | 2.100890000  | -6.209794000 | 2.483491000  |
| 6  | -0.997958000 | -5.772784000 | 1.321005000  |
| 1  | -0.148326000 | -6.184526000 | 0.758175000  |
| 1  | -1.520469000 | -6.582936000 | 1.847661000  |

|   |              |              |              |
|---|--------------|--------------|--------------|
| 1 | -1.686113000 | -5.275889000 | 0.626314000  |
| 6 | 5.173901000  | -0.604016000 | 3.740886000  |
| 1 | 5.597669000  | -0.586522000 | 2.730177000  |
| 1 | 5.157705000  | 0.418414000  | 4.141411000  |
| 1 | 5.788867000  | -1.246037000 | 4.386488000  |
| 6 | 5.732510000  | -2.345472000 | -1.133797000 |
| 1 | 6.469847000  | -2.533043000 | -1.926606000 |
| 1 | 6.070294000  | -1.514754000 | -0.503023000 |
| 1 | 5.607500000  | -3.251333000 | -0.525423000 |
| 6 | 5.798797000  | 1.553113000  | 0.301462000  |
| 1 | 6.108642000  | 1.345116000  | -0.732775000 |
| 1 | 6.660898000  | 1.917075000  | 0.877163000  |
| 1 | 5.409308000  | 0.631069000  | 0.751210000  |
| 6 | -4.325326000 | 6.232316000  | -1.083300000 |
| 1 | -4.972465000 | 5.576233000  | -0.486822000 |
| 1 | -4.024395000 | 7.100230000  | -0.480758000 |
| 1 | -4.870686000 | 6.561280000  | -1.978711000 |
| 6 | -0.259409000 | 4.803020000  | -4.272590000 |
| 1 | -1.148482000 | 5.378167000  | -3.983053000 |
| 1 | 0.316614000  | 5.360059000  | -5.023739000 |
| 1 | -0.565103000 | 3.831791000  | -4.680617000 |
| 6 | -0.514012000 | 5.339342000  | 3.318158000  |
| 1 | 0.043763000  | 6.239628000  | 3.615422000  |
| 1 | -1.576840000 | 5.572507000  | 3.156150000  |
| 1 | -0.369916000 | 4.551982000  | 4.068336000  |
| 6 | 4.113368000  | 2.720290000  | 5.902844000  |
| 1 | 4.287064000  | 1.648699000  | 5.746797000  |
| 1 | 5.056895000  | 3.272602000  | 5.795994000  |
| 1 | 3.707870000  | 2.882580000  | 6.910907000  |
| 6 | -0.386842000 | -0.824525000 | 6.038668000  |
| 1 | 0.547878000  | -1.267125000 | 5.672622000  |
| 1 | -0.250975000 | -0.458190000 | 7.065411000  |
| 1 | -1.187793000 | -1.575973000 | 6.017465000  |
| 6 | 5.931004000  | 3.083489000  | -3.513054000 |
| 1 | 5.996819000  | 4.043902000  | -4.042225000 |
| 1 | 5.771316000  | 3.264949000  | -2.442392000 |
| 1 | 6.856874000  | 2.514170000  | -3.672075000 |
| 6 | 0.648685000  | 1.031418000  | -6.244254000 |
| 1 | -0.274618000 | 1.581266000  | -6.023179000 |
| 1 | 1.504688000  | 1.719412000  | -6.203967000 |
| 1 | 0.581881000  | 0.584026000  | -7.245413000 |
| 6 | 1.462651000  | -4.175661000 | -3.859969000 |
| 1 | 0.804816000  | -3.841661000 | -4.674201000 |
| 1 | 2.269832000  | -3.448453000 | -3.713859000 |
| 1 | 1.885306000  | -5.160661000 | -4.101280000 |
| 6 | -3.999297000 | 1.051020000  | -4.829910000 |
| 1 | -4.791627000 | 1.695591000  | -5.234632000 |
| 1 | -3.019544000 | 1.413942000  | -5.163204000 |
| 1 | -4.148869000 | 0.020343000  | -5.179585000 |
| 6 | -2.560010000 | -4.574597000 | -5.261564000 |
| 1 | -3.455564000 | -5.208387000 | -5.207594000 |
| 1 | -2.144077000 | -4.613109000 | -6.277518000 |
| 1 | -1.816145000 | -4.921190000 | -4.532925000 |
| 6 | -3.908998000 | 2.920726000  | 3.325952000  |
| 1 | -4.830447000 | 2.993981000  | 3.920468000  |
| 1 | -3.092717000 | 2.539791000  | 3.952108000  |
| 1 | -3.637861000 | 3.897989000  | 2.889735000  |
| 6 | -5.622551000 | -3.362586000 | 3.480337000  |
| 1 | -5.647936000 | -4.340096000 | 3.980964000  |
| 1 | -6.551666000 | -2.817385000 | 3.695068000  |

|    |              |              |              |
|----|--------------|--------------|--------------|
| 1  | -5.504762000 | -3.500635000 | 2.397720000  |
| 6  | -5.788979000 | -1.558667000 | -0.370461000 |
| 1  | -6.665519000 | -2.042845000 | -0.822407000 |
| 1  | -6.012286000 | -1.280630000 | 0.669209000  |
| 1  | -5.524349000 | -0.661065000 | -0.942997000 |
| 29 | -1.751261000 | 4.770025000  | 0.352657000  |
| 8  | -2.925327000 | 5.498911000  | 1.688787000  |
| 1  | -3.817891000 | 5.621174000  | 1.342406000  |

### 3. References

1. X. Yuan, N. Goswami, I. Mathews, Y. Yu and J. Xie, Enhancing stability through ligand-shell engineering: A case study with Au<sub>25</sub>(SR)<sub>18</sub> nanoclusters, *Nano Research*, 2015, **8**, 3488-3495.
2. H. Liu, Y. Li, S. Sun, Q. Xin, S. Liu, X. Mu, X. Yuan, K. Chen, H. Wang, K. Varga, W. Mi, J. Yang and X.-D. Zhang, Catalytically potent and selective clusterzymes for modulation of neuroinflammation through single-atom substitutions, *Nature Communications*, 2021, **12**, 114.
3. H. Qian, D.-e. Jiang, G. Li, C. Gayathri, A. Das, R. R. Gil and R. Jin, Monoplatinum Doping of Gold Nanoclusters and Catalytic Application, *Journal of the American Chemical Society*, 2012, **134**, 16159-16162.
4. S. Yamazoe, W. Kurashige, K. Nobusada, Y. Negishi and T. Tsukuda, Preferential Location of Coinage Metal Dopants (M = Ag or Cu) in [Au<sub>25-x</sub>M<sub>x</sub>(SC<sub>2</sub>H<sub>4</sub>Ph)<sub>18</sub>]<sup>-</sup> (x ~ 1) As Determined by Extended X-ray Absorption Fine Structure and Density Functional Theory Calculations, *The Journal of Physical Chemistry C*, 2014, **118**, 25284-25290.
5. Gaussian 16, M. J. Frisch, G. W. Trucks, H. B. Schlegel, G. E. Scuseria, M. A. Robb, J. R. Cheeseman, G. Scalmani, V. Barone, G. A. Petersson, H. Nakatsuji, X. Li, M. Caricato, A. V. Marenich, J. Bloino, B. G. Janesko, R. Gomperts, B. Mennucci, H. P. Hratchian, J. V. Ortiz, A. F. Izmaylov, J. L. Sonnenberg, D. Williams-Young, F. Ding, F. Lipparini, F. Egidi, J. Goings, B. Peng, A. Petrone, T. Henderson, D. Ranasinghe, V. G. Zakrzewski, J. Gao, N. Rega, G. Zheng, W. Liang, M. Hada, M. Ehara, K. Toyota, R. Fukuda, J. Hasegawa, M. Ishida, T. Nakajima, Y. Honda, O. Kitao, H. Nakai, T. Vreven, K. Throssell, J. A. Montgomery, Jr., J. E. Peralta, F. Ogliaro, M. J. Bearpark, J. J. Heyd, E. N. Brothers, K. N. Kudin, V. N. Staroverov, T. A. Keith, R. Kobayashi, J. Normand, K. Raghavachari, A. P. Rendell, J. C. Burant, S. S. Iyengar, J. Tomasi, M. Cossi, J. M. Millam, M. Klene, C. Adamo, R. Cammi, J. W. Ochterski, R. L. Martin, K. Morokuma, O. Farkas, J. B. Foresman, and D. J. Fox, Gaussian, Inc., Wallingford CT, **2016**.
6. C. Y. Legault, CYLview20, Université de Sherbrooke, **2020**. <http://www.cylview.org>
7. J. H. Wang, R. L. Huang, W. Qi, R. X. Su and Z. M. He, Construction of biomimetic nanozyme with high laccase- and catecholase-like activity for oxidation and detection of phenolic compounds, *J Hazard Mater*, 2022, 429.
8. W. Cheng, H. Zhang, D. Luan and X. W. Lou, Exposing unsaturated Cu<sub>1</sub>-O<sub>2</sub> sites in nanoscale Cu-MOF for efficient electrocatalytic hydrogen evolution, *Science Advances*, 2021, **7**, eabg2580.
9. Z. Li, L. Xue, J. Yang, S. Wuttke, P. He, C. Lei, H. Yang, L. Zhou, J. Cao, A. Sinelshchikova, G. Zheng, J. Guo, J. Lin, Q. Lei, C. J. Brinker, K. Liu and W. Zhu, Synthetic Biohybrids of Red Blood Cells and Cascaded-Enzymes@ Metal–Organic Frameworks for Hyperuricemia Treatment, *Advanced Science*, 2024, **11**, 2305126.
10. L. Zhang, C. Zhang, Z.-N. Zhuang, C.-X. Li, P. Pan, C. Zhang and X.-Z. Zhang, Bio-inspired nanoenzyme for metabolic reprogramming and anti-inflammatory treatment of hyperuricemia and gout, *Science China Chemistry*, 2021, **64**, 616-628.
11. X. Liang, Y. Chen, K. Wen, H. Han and Q. Li, Urate oxidase loaded in PCN-222(Fe) with peroxidase-like activity for colorimetric detection of uric acid, *J Mater Chem B*, 2021, **9**, 6811-6817.
12. X. Liu, W. Qi, Y. Wang, R. Su and Z. He, A facile strategy for enzyme immobilization with highly stable hierarchically porous metal–organic frameworks, *Nanoscale*, 2017, **9**, 17561-17570.
13. A. Badoei-dalfard, N. Sohrabi, Z. Karami and G. Sargazi, Fabrication of an efficient and sensitive colorimetric biosensor based on Uricase/ Th-MOF for uric acid sensing in biological samples, *Biosensors and Bioelectronics*, 2019, **141**, 111420.
14. J. Ming, T. Zhu, J. Li, Z. Ye, C. Shi, Z. Guo, J. Wang, X. Chen and N. Zheng, A Novel Cascade Nanoreactor Integrating Two-Dimensional Pd-Ru Nanozyme, Uricase and Red Blood Cell Membrane for Highly Efficient Hyperuricemia Treatment, *Small*, 2021, **17**, 2103645.

15. X. P. Liu, Z. J. Zhang, Y. Zhang, Y. J. Guan, Z. Liu, J. S. Ren and X. G. Qu, Artificial Metalloenzyme-Based Enzyme Replacement Therapy for the Treatment of Hyperuricemia, *Advanced Functional Materials*, 2016, 26, 7921-7928.
16. J. Mu, L. Zhang, M. Zhao and Y. Wang, Co<sub>3</sub>O<sub>4</sub> nanoparticles as an efficient catalase mimic: Properties, mechanism and its electrocatalytic sensing application for hydrogen peroxide, *Journal of Molecular Catalysis A: Chemical*, 2013, **378**, 30-37.
17. W. Y. Zhen, Y. Liu, W. Wang, M. C. Zhang, W. X. Hu, X. D. Jia, C. Wang and X. E. Jiang, Specific "Unlocking" of a Nanozyme-Based Butterfly Effect To Break the Evolutionary Fitness of Chaotic Tumors, *Angew Chem Int Edit*, 2020, 59, 9491-9497.
18. M. Gharib, A. Kornowski, H. Noei, W. J. Parak and I. Chakraborty, Protein-Protected Porous Bimetallic AgPt Nanoparticles with pH-Switchable Peroxidase/Catalase-Mimicking Activity, *ACS Materials Letters*, 2019, 1, 310-319.
19. Y. Liu, Y. Qing, L. Jing, W. Zou and R. Guo, Platinum–Copper Bimetallic Colloid Nanoparticle Cluster Nanozymes with Multiple Enzyme-like Activities for Scavenging Reactive Oxygen Species, *Langmuir*, 2021, 37, 7364-7372.
20. K. L. Fan, J. Q. Xi, L. Fan, P. X. Wang, C. H. Zhu, Y. Tang, X. D. Xu, M. M. Liang, B. Jiang, X. Y. Yan and L. Z. Gao, In vivo guiding nitrogen-doped carbon nanozyme for tumor catalytic therapy, *Nature Communications*, 2018, 9, 1440.
21. J. Mu, L. Zhang, M. Zhao and Y. Wang, Catalase Mimic Property of Co<sub>3</sub>O<sub>4</sub> Nanomaterials with Different Morphology and Its Application as a Calcium Sensor, *ACS Applied Materials & Interfaces*, 2014, 6, 7090-7098.
22. J. Fan, J.-J. Yin, B. Ning, X. Wu, Y. Hu, M. Ferrari, G. J. Anderson, J. Wei, Y. Zhao and G. Nie, Direct evidence for catalase and peroxidase activities of ferritin–platinum nanoparticles, *Biomaterials*, 2011, 32, 1611-1618.
23. W. Ma, J. Mao, X. Yang, C. Pan, W. Chen, M. Wang, P. Yu, L. Mao and Y. Li, A single-atom Fe–N<sub>4</sub> catalytic site mimicking bifunctional antioxidative enzymes for oxidative stress cytoprotection, *Chemical Communications*, 2019, 55, 159-162.
